1 **Shell Morphology, Radula and Genital Structures of New Invasive Giant African Land**  
2 **Snail Species, *Achatina fulica* Bowdich, 1822, *Achatina albopicta* E.A. Smith (1878) and**  
3 ***Achatina reticulata* Pfeiffer 1845 (Gastropoda:Achatinidae) in Southwest Nigeria**

4

5

6

7

8

9 **Alexander B. Odaibo<sup>1</sup> and Suraj O. Olayinka<sup>2</sup>**

10

11 **<sup>1,2</sup>Department of Zoology, University of Ibadan, Ibadan, Nigeria**

12

13 **Corresponding author: Alexander B. Odaibo**

14 **E.mail :alexodaibo@yahoo.com (AB)**

15

16

17

18

## 19 **Abstract**

20           The aim of this study was to determine the differences in the shell, radula and genital  
21 structures of 3 new invasive species, *Achatina fulica* Bowdich, 1822, *Achatina albopicta* E.A.  
22 Smith (1878) and *Achatina reticulata* Pfeiffer, 1845 collected from southwestern Nigeria and to  
23 determine features that would be of importance in the identification of these invasive species in  
24 Nigeria. This is the first report of *Achatina albopicta* and *A. reticulata* in Nigeria, but *Achatina*  
25 *fulica* have since been reported in Nigeria and other African countries outside coastal East  
26 Africa. No study has described the external or internal morphology of any of the invasive species  
27 in Nigeria. Five to ten live specimens of each species, with complete shell characters, of each  
28 species were used for this study. Vernier caliper was used to obtain all shell measurements, with  
29 the shell held vertically and the aperture facing the observer. The genital structures were  
30 dissected out and fixed in 70% alcohol for 10-15 minutes and examined. The buccal mass was  
31 dissected out and digested in 7.5% sodium hydroxide for 24 hrs to free the radula from snail  
32 tissues and then examined under the compound microscope.

33           The shells of the 3 new species were dextral, conical with pointed spire and narrow apex.  
34 The whorls were separated by deep sutures. The parietal walls and the columella of the three  
35 species were white but columella of *A. reticulata* had a characteristic thick deposit of white  
36 porcelain-like material. There were dark brown markings on the whorls of the three species on  
37 dirty brown background for *A. fulica* and *A. reticulata* and dirty yellowish background for *A.*  
38 *albopicta*. The shell of *A. albopicta* was slightly glossy on the body whorl. The whorls of *A.*  
39 *albopicta* were much more convex than the whorls of *A. fulica* and *A. reticulata*. The columella  
40 of *A. albopicta* was truncate above the base of the peristome, moderately concave and slightly

41 curved up at the base, while the columella of *A. fulica* was truncate sharply at the base of the  
42 peristome and straight and the columella of *A. reticulata* was slantly truncate at the base of the  
43 peristome and straight. The genitalia of the three species were very identical but differed slightly  
44 in the emergence of the basal vas deferens from the penis. The penes were slender and  
45 completely enclosed by the penial sheaths. The length of the penis varied from 10 to 12 mm. The  
46 vas deferens, free oviduct and the spermatheca duct were very long. The radula could be  
47 differentiated by the structure of central teeth and the first lateral tooth. The study showed that  
48 the shell morphology, radula and genital structures can be of importance in the identification of  
49 members of the family Achatinidae in Nigeria.

50 Key words: *Achatina fulica*, *Achatina albopicta*, *Achatina reticulata*, invasive species, shell  
51 morphology, radula, genital structures.

52

53

54

55

56

57

58

59

60

## 61 **Introduction**

62 Species of Achatinidae are endemic in African countries south of the Sahara. They are  
63 characterized by large to medium sized, broadly ovate shells, with regular conical spires. With  
64 increase in mobility of humans and globalization of travel and trade, several achatinids, have  
65 been accidentally or purposefully transported to areas outside their native range, where they  
66 cause significant economic and ecological impacts [1]. *Achatina fulica* Bowdich, 1822 and its  
67 subspecies are native to the coastal East Africa, particularly Kenya and Tanzania but have now  
68 been introduced to many other African countries like Cote d'Ivoire, Togo, Ghana, Nigeria [2-6],  
69 Benin Republic where *A. fulica* has already overtaken the west African land giant snails in  
70 population density [7], and many countries in tropical and subtropical regions [1].

71 The Giant African land snails *Achatina fulica* Bowdich, 1822 is considered to be among the  
72 world's 100 worst invasive species and also ranked among the worst snail pests of tropical and  
73 sub-tropical regions, causing significant damages to farms, commercial plantations and domestic  
74 gardens [8]. It is an intermediate host of the rat lungworm, *Angiostrongylus cantonensis*, which  
75 causes eosinophilic meningoencephalitis in humans and *Angiostrongylus costaricensis*, the  
76 etiological agent of abdominal angiostrongylosis [9, 10]. *A. fulica* can consume several species of  
77 native plants, agricultural and horticultural crops, modify habitats and outcompete native species  
78 [11]. In Nigeria the West African species of *Archachatina* and *Achatina* (subgenus *Achatina*) are  
79 usually favoured and they grow to reasonable sizes than any other known land snails. The genus  
80 *Achatina* had been represented by *Achatina achatina* (Linne) and its subspecies, but in recent  
81 times *Achatina fulica* (subgenus *Lissachatina*) has been reported in some parts of the

82 country [ 5,6]. A recent study of the live specimens of *Achatina* spp collected from Itori, in  
83 Ogun state and the University of Ibadan, Ibadan, Nigeria in Oyo state, showed that the samples  
84 collected were represented by three separate species ( *Achatina fulica*, *Achatina albopicta* and *A.*  
85 *reticulata*),following the original descriptions of Bequaert [12]. Shell morphology alone could  
86 not reveal clearly the differences between these species, hence a combination of shell, radula and  
87 genital structures known to be important in the classification molluscs [13] were investigated for  
88 their significance in the identification of the invasive snail species. This study was undertaken to  
89 reveal the differences in the shell, radula and genital structures of the three invasive species and  
90 provide notes on characters that can be important for their identification in areas where they have  
91 been recently introduced and to contribute to the available information on the terrestrial  
92 molluscan species richness in Nigeria that is still poorly investigated.

93

94

95

96

97

98

99

100

101

## 102 **Materials and Methods.**

### 103 **Snail samples**

104 The samples of *Achatina fulica* used for this study were collected from Itori, headquarter of  
105 Ewekoro Local Government Area in Ogun State, Nigeria, located at 6°93'23"N and 3°22'47"E.  
106 The average monthly temperature ranges from 23°C to 32.2°C and it is a tropical rain forest area  
107 undergoing transition to guinea savannah due to farming and mining activities. The samples of  
108 *Achatina albopicta* and *A. reticulata* were collected from the residential areas of University of  
109 Ibadan, Ibadan, Oyo state, Nigeria , located at 7° 23'28.19" and 3° 54'59.99" E "Fig.1". Five to  
110 ten live snails were used for the study. Snails were identified using Bequaert [12].

### 111 **Snailery**

112 Snail samples collected from the field were maintained in the snailery in the Department of  
113 Zoology, University of Ibadan, Ibadan, Nigeria, before examination. Snails were kept in  
114 rectangular glass containers (93 x 62 x 58 cm), with metal mesh covers, field half way with  
115 moist humus soil. The snails were maintained under the natural regime of 12hr light and 12hr  
116 darkness, fed *ad libitum* with *Carica papaya* leaves, *Tridax triangulare* leaves and unripe  
117 pawpaw fruits before examination.

118

119 **Fig 1. Map of Oyo and Ogun States Showing the Collection Sites for the Invasive *Achatina***  
120 **Species in Nigeria**

121

## 122 **Shell morphometrics**

123 Vernier caliper was used to obtain the conchological character measurements [14]. All  
124 measurements were taken with the shell held vertically with the aperture facing the observer, and  
125 only complete shells i.e. shells with no missing parts, were used for the study. The shell height  
126 (SH) was the longest vertical axis of the shell, measured from the tip of the spire to the basal  
127 edge of the outer lip. The shell width (SW) was the largest diameter, measured at right angle to  
128 the vertical axis, from the left margin of the body whorl to the outer edge of outer lip. The  
129 aperture height (AH) was the longest distance from the insertion of the outer lip on the parietal  
130 wall to the basal edge of the outer lip, while the aperture width (AW) was the greatest distance  
131 from the inner edge of the columella to the edge of the outer lip. The spire height (SpH) was  
132 measured from the tip of the apex to the suture separating the spiral whorls from the body whorl,  
133 and the body whorl height was the measured from the suture separating the spire from the body  
134 whorl to the base of the peristome (BwH). All measurements were in millimeters.

## 135 **Shell parameter indices**

136 From the values obtained for each linear measurement, the following indices were determined,  
137 following the methodology of Medeiros et al.[15]: the shell height/shell width (SH/SW); body  
138 whorl height/shell width (BwH/SW); shell aperture height/shell aperture width (AH/AW); and  
139 spire height/ body whorl height (SpH/BwH).

140

141

## 142 **Number of whorls**

143 The number of whorls corresponds to the number of complete turns of the shell beginning from  
144 the embryonal whorls at the tip of the spire.

## 145 **Dissection of genital structures**

146 Each specimen was placed in a jar filled with boiling water for 10 – 15 minutes to loosen the  
147 columellar muscle and the soft body was extracted from the shell with hooked metal. The shell  
148 was preserved for shell morphometrics. The genital structure was dissected out of the soft body  
149 and fixed in 70% alcohol for 10 minutes and examined. The genital structure was then preserved  
150 in 10% formalin.

## 151 **Radula preparation**

152 The buccal mass was dissected out of the head region of the soft body and macerated in 7.5%  
153 sodium hydroxide for 24 hours at room temperature. The freed radula was washed in water and  
154 any leftover tissues were removed under the dissecting microscope. The radula was mounted in  
155 glycerine and view under the compound microscope. After observation the radula was preserved  
156 in 70% alcohol. Photographs of radula were taken with UCMOS series microscope camera  
157 MU500 with Toupview 3.2 image software.

## 158 **Statistical analysis**

159 To detect variations in shell morphology between species, the linear measurements and ratios  
160 were subjected to logarithmic transformation ( $\log_{10}$ ) before using Analysis of Variance  
161 (ANOVA,  $p \leq 0.05$ ).



## 162 **Results and Discussion**

163 The three new species in this study, *Achatina fulica*, *A. albopicta*, and *A. reticulata* were  
164 collected from residential areas in Ibadan, an urban community and from farmlands in Itori, a  
165 semi urban community in southwest Nigeria. The invasive species are known to thrive in the  
166 presence of man, especially in urban sites and farms or disturbed areas [8], and they have  
167 superior competitive abilities over endemic species, whose distributions are often affected, due to  
168 the high fecundity and reproductive rates of the invasive species [11]. This invasion will  
169 significantly impact the species richness of land snails in Nigeria. It is therefore important that  
170 the extent of this invasion in Nigeria is monitored and properly managed before they assume pest  
171 status or dominance over the West Africa species of achatinidae that have served as cheap  
172 sources of protein for the rural populace and have not been incriminated in the transmission of  
173 any known parasitic infections of public health importance. The invasive *A. fulica* has achieved  
174 dominance in the achatinid communities in Ivory Coast, Ghana and central Benin Republic [1,  
175 7]. While it is not precisely known how the invasive species got to Nigeria; it is most likely that  
176 they were introduced for economic reasons and subsequent uncontrolled uses may increase their  
177 ranges in future as they are moved around for sale, food or farming by humans. What should  
178 also be of concern, apart from the effect on ecology and biodiversity, is that the invasive species  
179 can act as intermediate hosts of Metastrongylidae nematodes, particularly now that  
180 *Angiostrongylus cantonensis* Cheg, 1935, which causes eosinophilic meningitis is spreading  
181 rapidly to many parts of the world [ 10].

182 The shell morphology of the three invasive species (*Achatina fulica*, *A. albopicta* and *A.*  
183 *reticulata*) in this study conformed to the original descriptions of the three species from East

184 Africa [12]. The shells were dextral, conical with pointed spires and narrow apex. They had a  
185 minimum of 8 whorls and the whorls were separated by deep sutures. The parietal walls and  
186 columella of the three species were whitish. There were dark brown markings on the whorls of  
187 the three species, but on dirty brown background for *A. fulica* “Fig 2” and *A. reticulata* “Fig 3”,  
188 and dark brown or yellowish background for *A. albopicta* “Fig 4”, which was also slightly glossy  
189 on the body wall. The major differences in shell features are shown in “Table 1”.

190

191 **Fig 2. Apertural and abaperural views of shell of *Achatina fulica* collected**

192 **From Itori, Ogun State, Nigeria. Scale bar = 1.0cm**

193 **Fig 3. Apertural and abaperural views of shell of *Achatina reticulata* collected**

194 **from Ibadan. Scale bar = 1.0 cm**

195 **Fig 4. Apertural and abaperural views of shell of *Achatina reticulata* collected**

196 **from Ibadan. Scale bar = 1.0 cm**

197

198 The three invasive species exhibited considerable morphometric similarities “Table 2”. They  
199 were high-spired species (shell height > shell width), and the shell spired index (SH/SW) ranged  
200 from 1.8-2.0. The shell of *A. fulica* was most slender (SH/SW=2.0±0.04) followed by the shell of  
201 the shell of *A. reticulata* (SH/SW=2.0±0.1) and *A. albopicta* (SH/SW=1.8±0.1). However, the  
202 mean values of the shell parameters were significantly ( $p < 0.05$ ) larger for *A. reticulata* than *A.*  
203 *fulica* and *A. albopicta* “Table 2”. The shells of *Achatina reticulata* had a mean height of

204 134.0.3± 17.4 mm and was larger than the shell of *A. fulica* (90.0 ± 2.7 mm) and *A. albopicta*  
 205 (104.1± 7.6 mm ) “Table 2”. The aperture index (AP/AW) ranged from 1.9-2.3 among the three  
 206 species. The shell shapes fit into the patterns described for invasive achatinidae [16]; this study  
 207 showed that the three species had elongated spire with narrow body whorl and narrow aperture.  
 208 *Achatina reticulata* was the largest of the three species in this study with conspicuous  
 209 longitudinal sculptures on the body whorl. The high shell-spired indices of the three species may  
 210 account for the ease with which they burrow or burry in the soil.

211 **Table 1. Showing differences in shell characters of the invasive Achatina species in**  
 212 **southwestern Nigeria.**

| Shell characters | <i>Achatina</i> species                                                                                                              |                                                                                                                                   |                                                                                                                                                                      |
|------------------|--------------------------------------------------------------------------------------------------------------------------------------|-----------------------------------------------------------------------------------------------------------------------------------|----------------------------------------------------------------------------------------------------------------------------------------------------------------------|
|                  | <i>Achatina fulica</i>                                                                                                               | <i>Achatina albopicta</i>                                                                                                         | <i>Achatina reticulata</i>                                                                                                                                           |
| Spire            | The spire occupied 30% of the total height of the shell, with longitudinal brown stripe or patches. The whorls were slightly convex. | The spire occupied 32% of the total shell height, with light brown irregular patches or stripes. The whorls were strongly convex. | The spire occupied 29 % of the total shell height, with dirty white background and zigzag/ longitudinal brown patches or stripes. . The whorls were strongly convex. |
| Body whorl       | Slightly glossy and terminates almost at the end of the columella.                                                                   | Slightly glossy, and extends below the truncated end of the columella.                                                            | Very rough with longitudinal sculptures visible to the naked eyes.                                                                                                   |
| Columella        | White, nearly straight and sharply truncated at the base of the aperture.                                                            | White, concave, bent upwards and sharply truncated above the base of the aperture.                                                | White porcelain-like deposit, straight and strongly truncated at a slant above the base of the aperture.                                                             |
| Parietal wall    | Dark brown background with faint white                                                                                               | White with faint dark brown background                                                                                            | Thick white porcelain-like deposit                                                                                                                                   |
| Inside of shell  | White with bluish tinge on a dark brown background                                                                                   | White with bluish tinge                                                                                                           | Very white with bluish tinge                                                                                                                                         |

|                        |                         |                      |                                           |
|------------------------|-------------------------|----------------------|-------------------------------------------|
| Outer lip of peristome | Blackish brown and thin | Light brown and thin | Thick and white with broken brown patches |
|------------------------|-------------------------|----------------------|-------------------------------------------|

213

214 **Table 2. Morphometric characterization of invasive Achatinidae collected from**  
 215 **southwestern Nigeria**

216

| Character/Index        | <i>Achatina fulica</i> | <i>Achatina albopicta</i> | <i>Achatina reticulata</i> |                                |
|------------------------|------------------------|---------------------------|----------------------------|--------------------------------|
|                        | X±SD(Range)<br>mm      | X±SD (Range)<br>mm        | X±SD (Range)<br>mm         | P value                        |
| No. of whorls          | 8.3±0.1(8.25-8.5)      | 8.3±0.1(8.25-8.5)         | 8.4±1.4 (8.25-8.5)         | F=0.303;p=0.741 <sup>a</sup>   |
| Shell height(SH)       | 90.0±2.7(87-93)        | 104.1±7.6(98-120)         | 134.0±17.4 (103-145)       | F= 200.1;p=0.0001              |
| Shell width(SW)        | 44.4±0.8(43-45)        | 56.4±4.4(52-65)           | 70.6±3.0 (69-75)           | F=374.4;p=0.0000               |
| Spire height(SpH)      | 27.4±2.5(25-31)        | 30.5±1.3(29-32)           | 41.0±1.0(40-42)            | F=54.0;p=0.0000                |
| Body whorl height(BwH) | 57.3±3.9(52-64)        | 77.0±5.8(70-85)           | 88.8±2.3(88-92)            | F=0.0949;p=0.9098 <sup>a</sup> |
| Aperture height(AH)    | 44.4±0.7(43-45)        | 53.1±3.2(50-58)           | 56.0±1.2(55-58)            | F=104.8;p=0.0000               |
| Aperture width(AW)     | 22.0±1.2(20-24)        | 23.0±2.4(21-28)           | 30.6±1.5(29-33)            | F=64.0;p=0.0000                |
| SH/SW                  | 2.0±0.1(2.0-2.1)       | 1.8±0.1(1.8-1.9)          | 2.0±0.1(1.9-2.0)           | F=27.1;p=0.0000                |
| AH/AW                  | 2.0±0.1(1.9-2.1)       | 2.3±0.1(2.1-2.5)          | 1.9±0.1(1.8-2.0)           | F=28.9;p=0.0000                |
| BwH/SH                 | 1.3±0.1(1.2-1.5)       | 2.3±0.1(2.1-2.5)          | 1.9±0.1(1.8-2.0)           | F=1.157;p=0.335 <sup>a</sup>   |
| SpH/BwH                | 0.5±0.0(0.4-0.5)       | 0.4±0.0(0.4-0.4)          | 0.5±0.0(0.5-0.5)           | F=41.1;p=0.0000                |

217

218 <sup>a</sup>Non-significant difference between mean values

219 The genitalia of three species were very identical, the basal genital structures were similar;  
220 the penes were slender and completely enclosed by the penial sheath “Fig 5”. The length of the  
221 penes varied from 10 mm to 12 mm in the three species “Table 3”. The vas deferens, free oviduct  
222 and the spermatheca duct were very long. The basal uterus is slightly greenish and the apical  
223 uterus is yellowish to pale cream. The hermaphroditic duct is highly convoluted and the basal  
224 part is pale cream in colour while the apical part is black in colour. The major differences in the  
225 basal genital structures are shown in “Table 3”. The genital structures were significantly  
226 different from the genital structures of the West African Achatinidae [17].

227

228 **Fig 5. Diagrammatic illustrations of the basal portion of the genital system of *Achatina***  
229 ***albopicta* (A), *Achatina reticulata* (B), *Achatina fulica* (C), showing the basal portion of**  
230 **uterus and prostrate (a), spermatheca (b), spermatheca duct, basal portion of the vagina**  
231 **(d), penis (e), basal portion of vas deferens (f) and the flagellum (g). Scale bar = 1.0 cm**

232

233

234 **Table 3. Main features of the basal genital structures of *Achatina fulica*, *Achatina albopicta***  
235 **and *Achatina reticulata* collected from southwestern Nigeria**

236

237

238

239

240

241

242

| Basal Genital structures | <i>Achatina fulica</i>                                           | <i>Achatina albopicta</i>                                                          | <i>Achatina reticulata</i>                                |
|--------------------------|------------------------------------------------------------------|------------------------------------------------------------------------------------|-----------------------------------------------------------|
| Penis                    | 10-11mm long                                                     | 10-11 mm long                                                                      | 11-12 mm long                                             |
| Penis sheath             | Completely encloses the penis; basal portion of penis is swollen | Completely encloses the penis, swollen at the extreme end joining the basal vagina | Completely encloses the penis                             |
| Basal vas deferens       | Emerges from the sheath almost at the upper end of sheath        | Emerges from the sheath at the upper ¼ of the sheath                               | Emerges from the sheath close to the middle of the sheath |
| Basal vagina             | Swollen and corm-like                                            | Swollen and corm-like                                                              | Swollen and corm-like                                     |

243

244

245 The radulae of the three species followed the basic pattern for the pulmonata. There were a set of  
 246 teeth on either side of the median tooth, the lateral teeth and another set of marginal teeth. The  
 247 median teeth in the three species were very small compared to the lateral and marginal teeth and  
 248 they were bicuspid. The shape of the median tooth differed in the three species “Table 4”. The  
 249 lateral teeth of the three species were usually tricuspid, with a large centrally located cusp  
 250 (mesocone) and two poorly developed accessory cusps (endocone and ectocone) on both sides of  
 251 the central cusp. However, the first lateral tooth on the right side of the median tooth of *Achatina*  
 252 *reticulata* “Fig 6” had well developed accessory cusps (endocone) next to the median tooth; the  
 253 ectocone was not conspicuous. The radulae could be differentiated by the structures of their  
 254 median teeth “Figs 6A, 7A, and 8A”. The accessory cusps, increased in number and levels of  
 255 development from the first lateral tooth toward the margin, in the three species. The marginal  
 256 teeth of the three species “Figs 6C, 7C and 8C” were characterized by larger number of cusps,  
 257 with the mesocone and the accessory cusps (ectocone and endocone) further divided into smaller

258 cusps. This study appears to be the first to present a detail study of the radula structures of the  
 259 three invasive species. The radulae differed in the shape of median teeth, the development of the  
 260 accessory cusps, particularly the endocone on the first lateral teeth.

261

262

263 **Table 4. Main features of the radulae of *Achatina fulica*, *Achatina albopicta* and *Achatina***  
 264 ***reticulata* collected from southwestern Nigeria**

265

| Radula structures | <i>Achatina fulica</i>                                                                                         | <i>Achatina albopicta</i>                                                                | <i>Achatina reticulata</i>                                                                                                                                                                           |
|-------------------|----------------------------------------------------------------------------------------------------------------|------------------------------------------------------------------------------------------|------------------------------------------------------------------------------------------------------------------------------------------------------------------------------------------------------|
| Median tooth      | Bicuspid with two unequal cusps, the larger cusp was pointed and taller than the smaller one with flat surface | Bicuspid and the two cusps are nearly of the same heights and sizes, with flat surfaces. | Bicuspid with two unequal cusps, the smaller cusp was pointed and taller than the larger cusp. The median tooth was almost obscured by the well-developed ectocone of the first right lateral tooth. |
| Lateral teeth     | Tricuspid with well-developed mesocone                                                                         | Tricuspid with well-developed serrated mesocone                                          | Tricuspid with well-developed mesocone. The ectocone of the first right lateral tooth was well developed.                                                                                            |
| Marginal teeth    | Numerous with the ectocone and endocone further divided into smaller cusps                                     | Numerous with the ectocone further divided into smaller cusps                            | Numerous with the ectocone further divided into smaller cusps and the endocone greatly reduced.                                                                                                      |

266

267

268

269 **Fig 6. Micrograph of *Achatina reticulata* radula showing the bicuspid median tooth and the**  
270 **first right lateral teeth with well-developed endocone (A), tricuspid lateral teeth (B) and**  
271 **the marginal teeth (C). Scale bar = 1  $\mu$ m.**

272

273 **Fig 7. Micrograph of *Achatina albopicta* radula showing bicuspid median teeth (A),**  
274 **tricuspid lateral teeth and a serrated mesocone and the marginal teeth (C).**

275 **Scale bar = 1  $\mu$ m**

276 **Fig 8. Micrograph of *Achatina fulica* radula showing bicuspid median teeth (A), tricuspid**  
277 **lateral teeth (B) and the marginal teeth (C). Scale bar = 1 $\mu$ m**

278

279

## 280 **Conclusions**

281 This study has shown that the invasive achatinids have become established in Nigeria and  
282 apart from *A. fulica*, other new subspecies *A. albopicta* and *A. reticulata* have been introduced.  
283 The reproductive structures, shell morphology and radula structures can be useful in the  
284 taxonomy of land snails. The study also suggests that the invasive species generally referred to as  
285 *A. fulica* in other areas, where they have been introduced, may be a mixture of subspecies of  
286 *Achatina* (subgenus *Lissachatina*) which were probably introduced together. It is therefore,  
287 likely that the other subspecies of the subgenus *Lissachatina* may be more widely spread outside  
288 East Africa than is currently documented due to misidentification.



289

290

## 291 **Acknowledgments**

292 We thank Chris Odeh and TundeDisu, both of the Department of Zoology, University of  
293 Ibadan, Ibadan, Nigeria for their technical assistance. We are also grateful to Mr. Femi Balogun  
294 of the Department of Archaeology and Anthropology, University of Ibadan, Ibadan, Nigeria for

295

296

297

## 298 **References**

- 299 1. Raut SK, Barker GM. *Achatina fulica* Bowdich and other Achatinidae as pests in  
300 Tropical Agriculture, In: Barker editor, Molluscs as Crop Pests. UK: CABI International,  
301 2002.
- 302 2. Winter AJ.de. New records of *Achatina fulica* Bowdich from the Côte d' Ivoire. *Basteria*.  
303 1989; 53 (4-6): 71-72.
- 304 3. Monney, K. Explaining the facts about giant African snails. *Bulletin of the*  
305 *Malacological Society of London*. 2001; 37.
- 306 4. Ekoue, S and Kuevi-Akue, K. Investigations on consumption, distribution and breeding  
307 of giant snails in Togo. *Tropicultura*. 2002; 20 (1): 17-22,.

- 308 5. Ademolu, K.O., fantola, F.O., Bamidele, J.A., Dedeke, G.A., and Idowu, A.B. Formation  
309 and composition of epiphragm in three giant African land snails (*Archachatina*  
310 *marginata*, *Achatina fulica* and *Achatina achatina*). *Ruthenica*. 2016; 26 (3-4): 165-169.
- 311 6. Igbiosa I.B., Isaac, C., Adamu, H.D., Adeleke, G. Parasites of edible land snails in Edo  
312 State, Nigeria. *Helminthologia*. 2016; 53, (4): 331-335.
- 313 7. Idohou, R.D, Djagoun C,A.M,S, Kassa, B, Assogbadjo, A.E., Codjia, J.T.C. (2013). Soil  
314 factors affecting density of three giant land snail species in different habitats of Dass-  
315 Zoume district (central Benin). *QScience Connect*. 2013;  
316 31.doi.org/10.5339/connect.2013.31.
- 317 8. Albuquerque , F.S., Peso-Aguiar, M.C., Assuncao-Albuquerque, M.I.T (2008).  
318 Distribution, feeding behaviour and control strategies of the exotic land snail *Achatina*  
319 *fulica* (Gastropoda: Pulmonata) in the northeast Brazil. *Brazil Journal of Biology*. 2008;  
320 68 (4): 837-842.
- 321 9. Alicata, J.E. The discovery of *Angiostrongylus cantonensis* as a cause of human  
322 eosinophilic meningitis. *Parasitology Today*. 1991;7: 151-153.
- 323 10. Cowie R.H. (2013). Biology, systematics, life cycle, and distribution of *Angiostrongylus*  
324 *cantonensis*, the cause of rat lungworm disease. *Hawaii Journal of Medicine & Public*  
325 *Health*. 2013; 72 (6): 6-9, Supp. 2.
- 326 11. Rekha, S.R, Munsii, M. and Neelavara A.A. (2015).Effect of climate change on invasion  
327 risk of giant African snail (*Achatina fulica*, Ferussac, 1821: Achatinidae) in India. *PLoS*  
328 *ONE*. 2015; 10 (11): e0143724.doi:10.1371/journal.pone.0143724
- 329 12. Bequaert J.C. Studies in the Achatininae, a group of African land snails. *Bulletin of the*  
330 *Museum of Comparative Zoology*. 1950; 105 (1): 291 pp.

- 331 13. Oso, O.G., and Odaibo, A.B. Shell morphology and the radula structure of two closely  
332 related bulinid snail intermediate host of *Schistosoma haematobium* in Nigeria. African  
333 Journal of Biotechnology. 2018; 17 (9):269-278.
- 334 14. Madjos, G.G., and Demayo, C.G. (2018). Macro-Geographic variations of the Invasive  
335 giant African snail *Achatina fulica* populations in Mindanao, Philippines. Transactions on  
336 Science and Technology. 2018; 5 (2): 143-154.
- 337 15. Medeiros, C., Caldeira, R.L, Mendonca, C.L.F., Carvalho, O dos santos and Davila, S.  
338 Ontogeny and morphological variability of shell in populations of *Leptinaria unilamellata*  
339 (*d' orbigny*, 1835) (Mollusca: Pulmonata:Subulinidae). SpringerPlus. 2015; 4: 191. DOI  
340 10.1186.s40064-015-0959-x.
- 341 16. Sobrepena JMM, Demayo CG. Banding pattern and shape morphology variations on  
342 shells of the invasive giant African land snail *Achatina fulica* (Bowdich 1822) from the  
343 Philippines
- 344 17. Mead, A.R. Comparative genital anatomy of some African Achatinidae (Pulmonata).  
345 Bulletin of the Museum of Comparative Zoology. 1950; 105 (2); 219-294.

346  
347

## 348 **Supporting information**

349 S1 Table. Shell morphometrics of three invasive Achatinidae in southwest Nigeria

350  
351

bioRxiv preprint doi: <https://doi.org/10.1101/2019.12.16.377977>; this version posted December 16, 2019. The copyright holder for this preprint (which was not certified by peer review) is the author/funder, who has granted bioRxiv a license to display the preprint in perpetuity. It is made available under aCC-BY 4.0 International license.

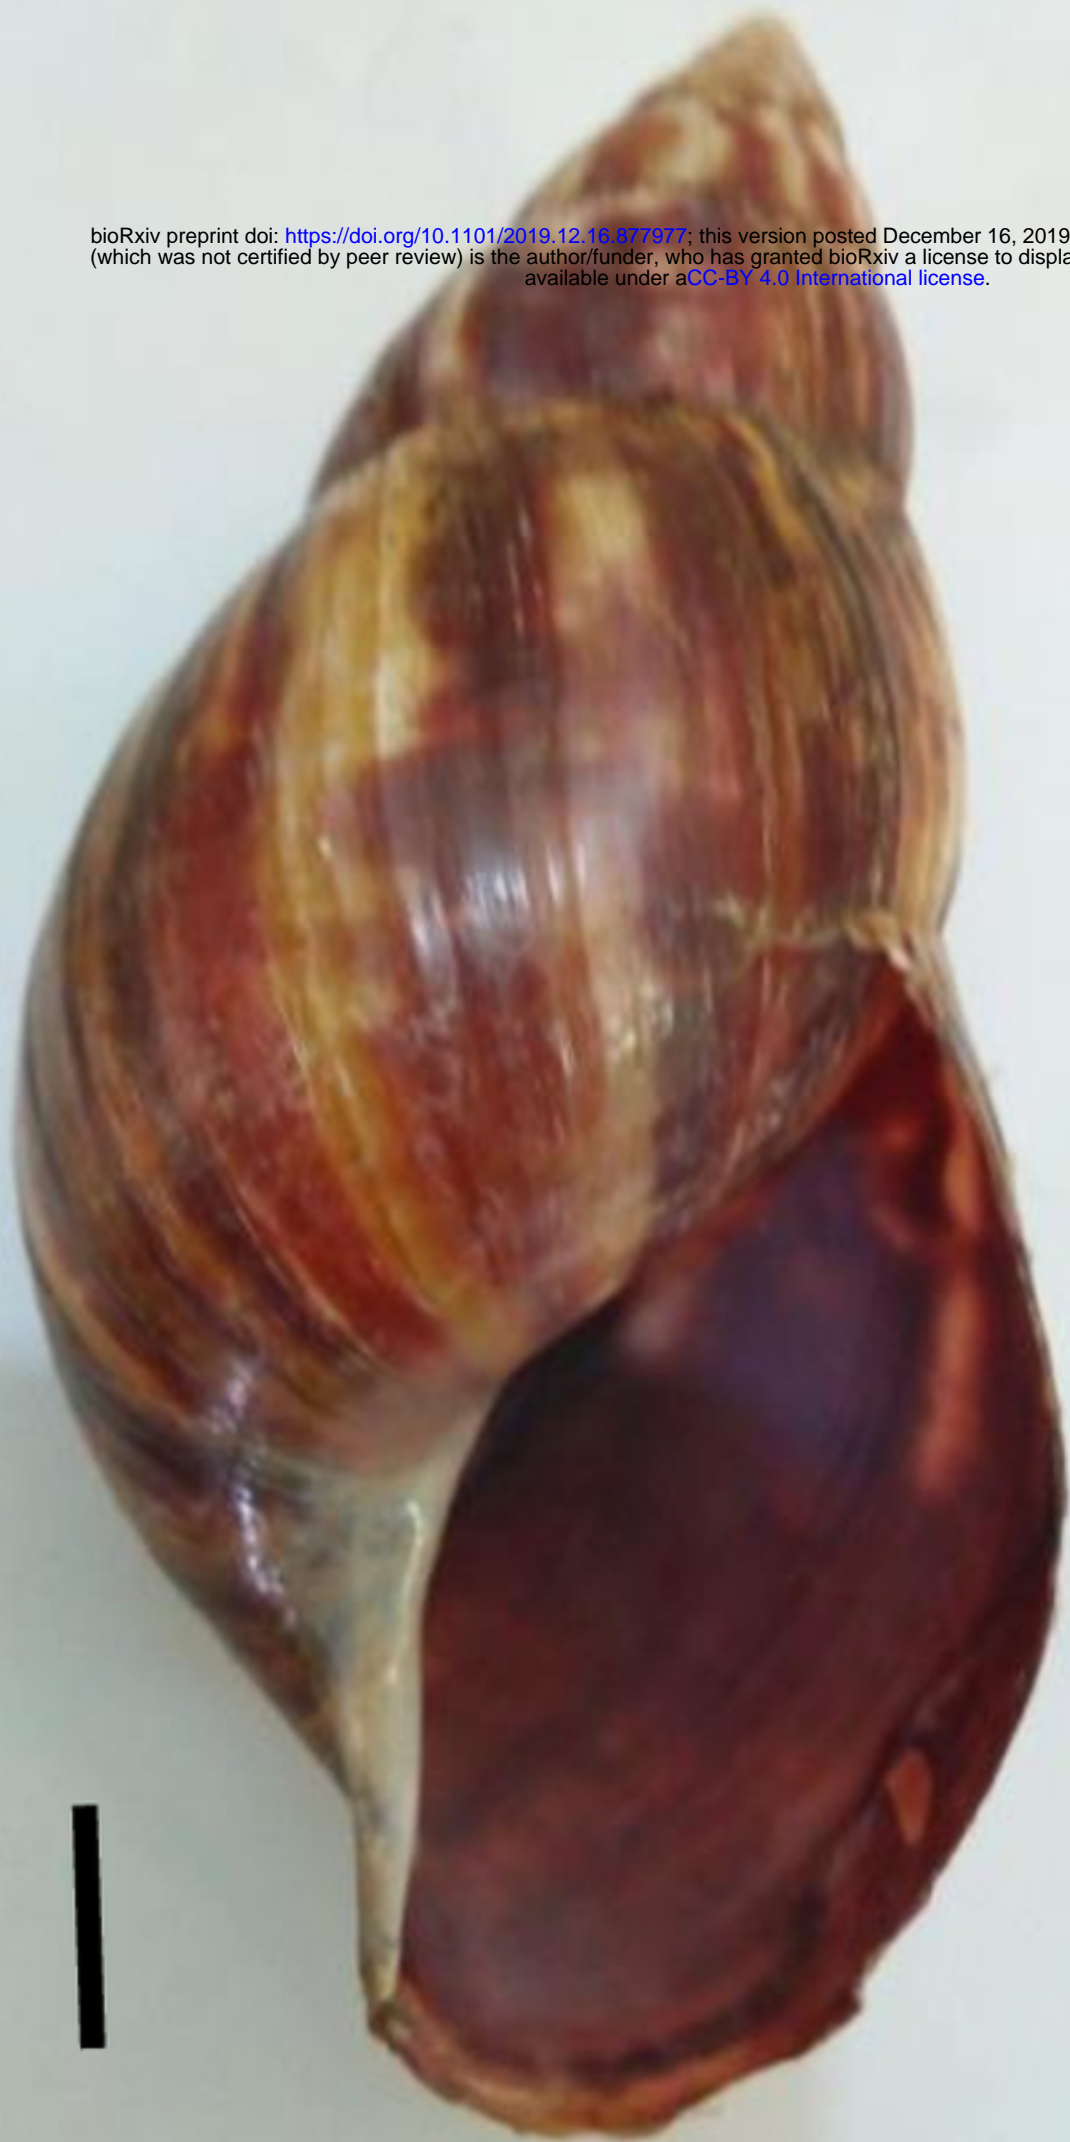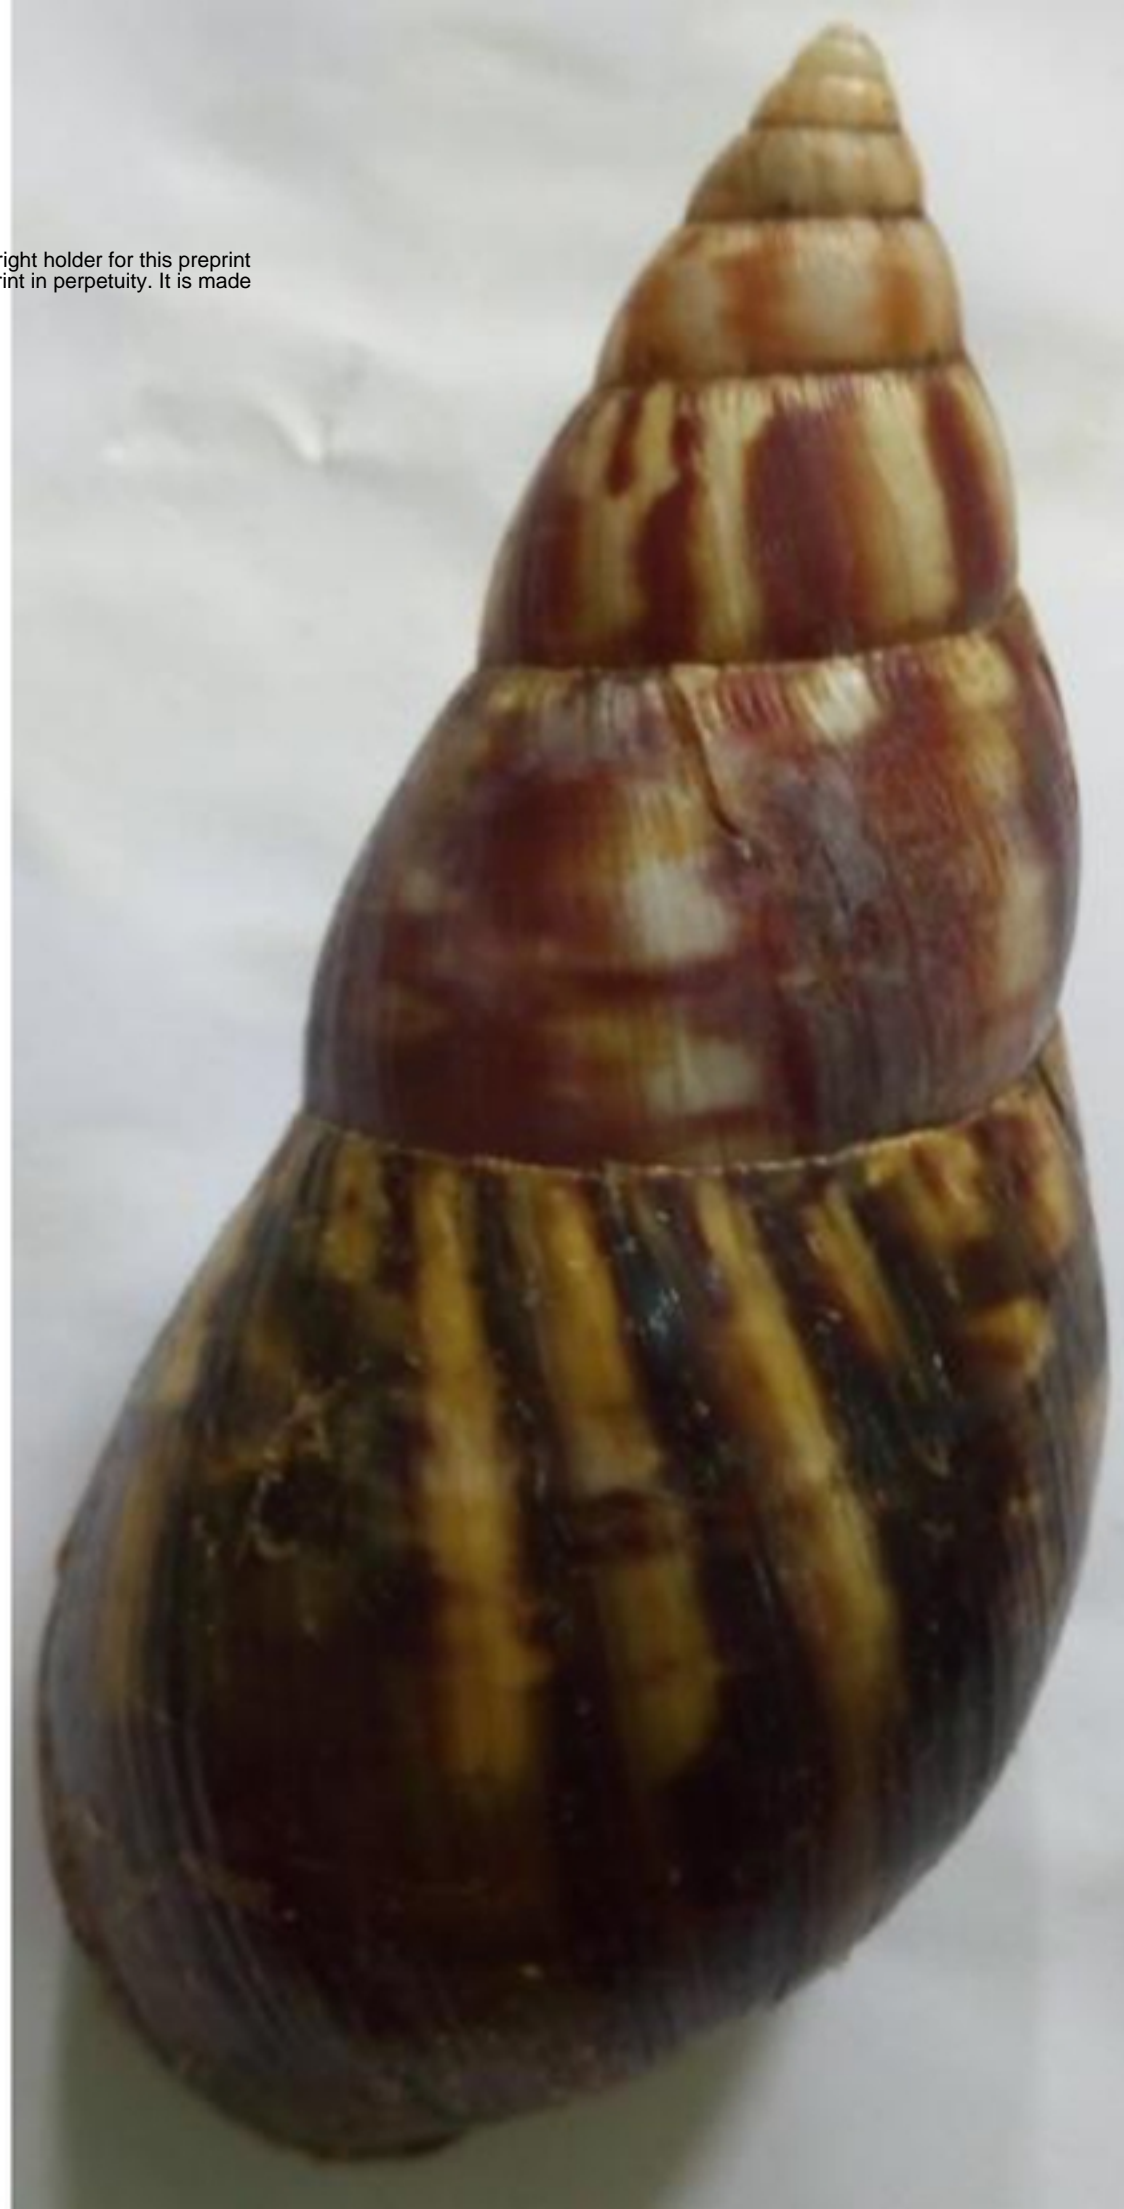

Figure

bioRxiv preprint doi: <https://doi.org/10.1101/2019.12.16.877977>; this version posted December 16, 2019. The copyright holder for this preprint (which was not certified by peer review) is the author/funder, who has granted bioRxiv a license to display the preprint in perpetuity. It is made available under aCC-BY 4.0 International license.

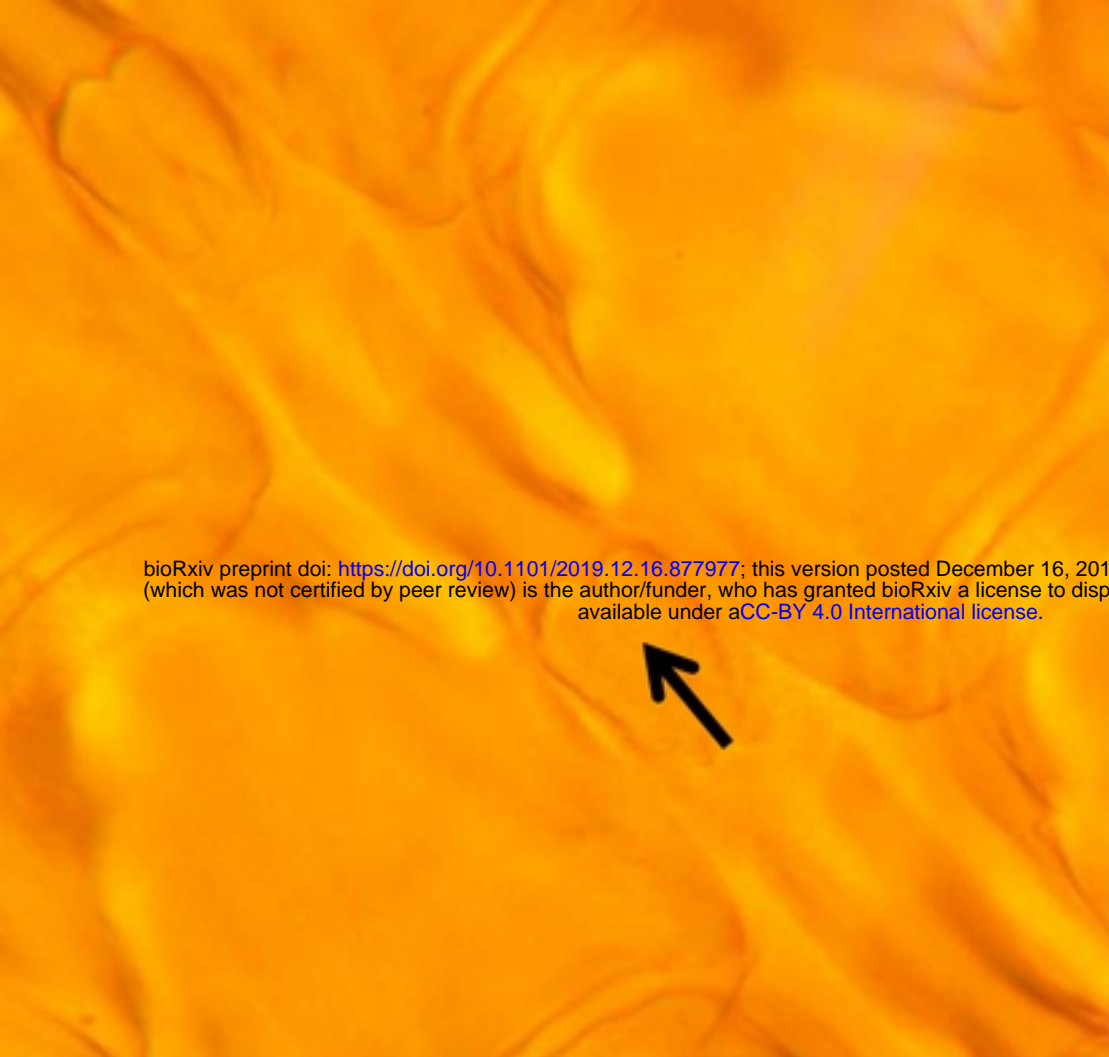

A

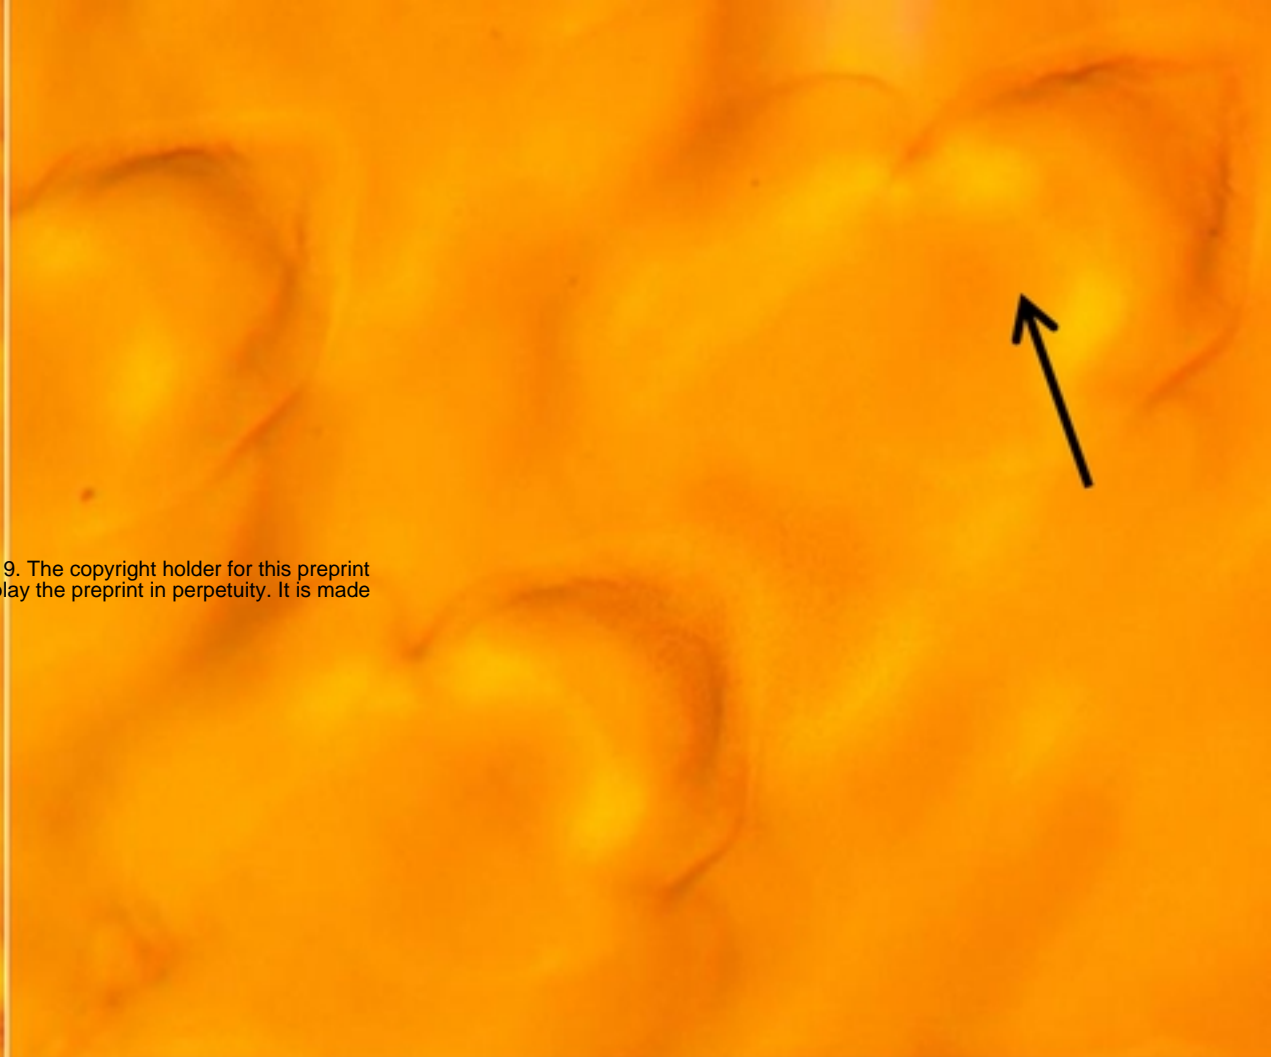

B

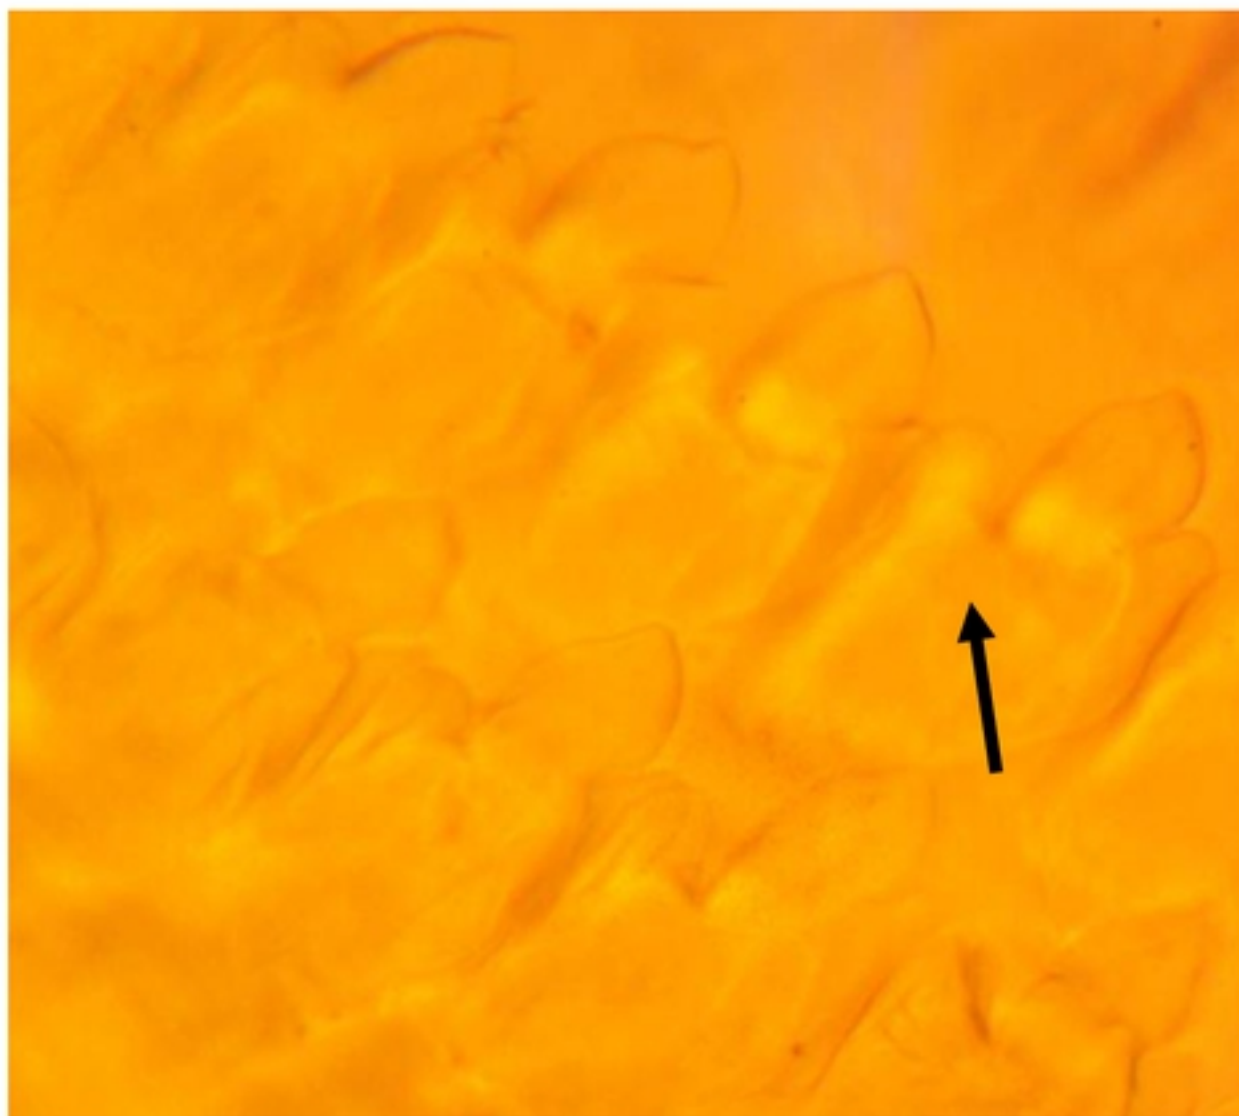

C

Figure

bioRxiv preprint doi: <https://doi.org/10.1101/2019.12.16.877977>; this version posted December 16, 2019. The copyright holder for this preprint (which was not certified by peer review) is the author/funder, who has granted bioRxiv a license to display the preprint in perpetuity. It is made available under aCC-BY 4.0 International license.

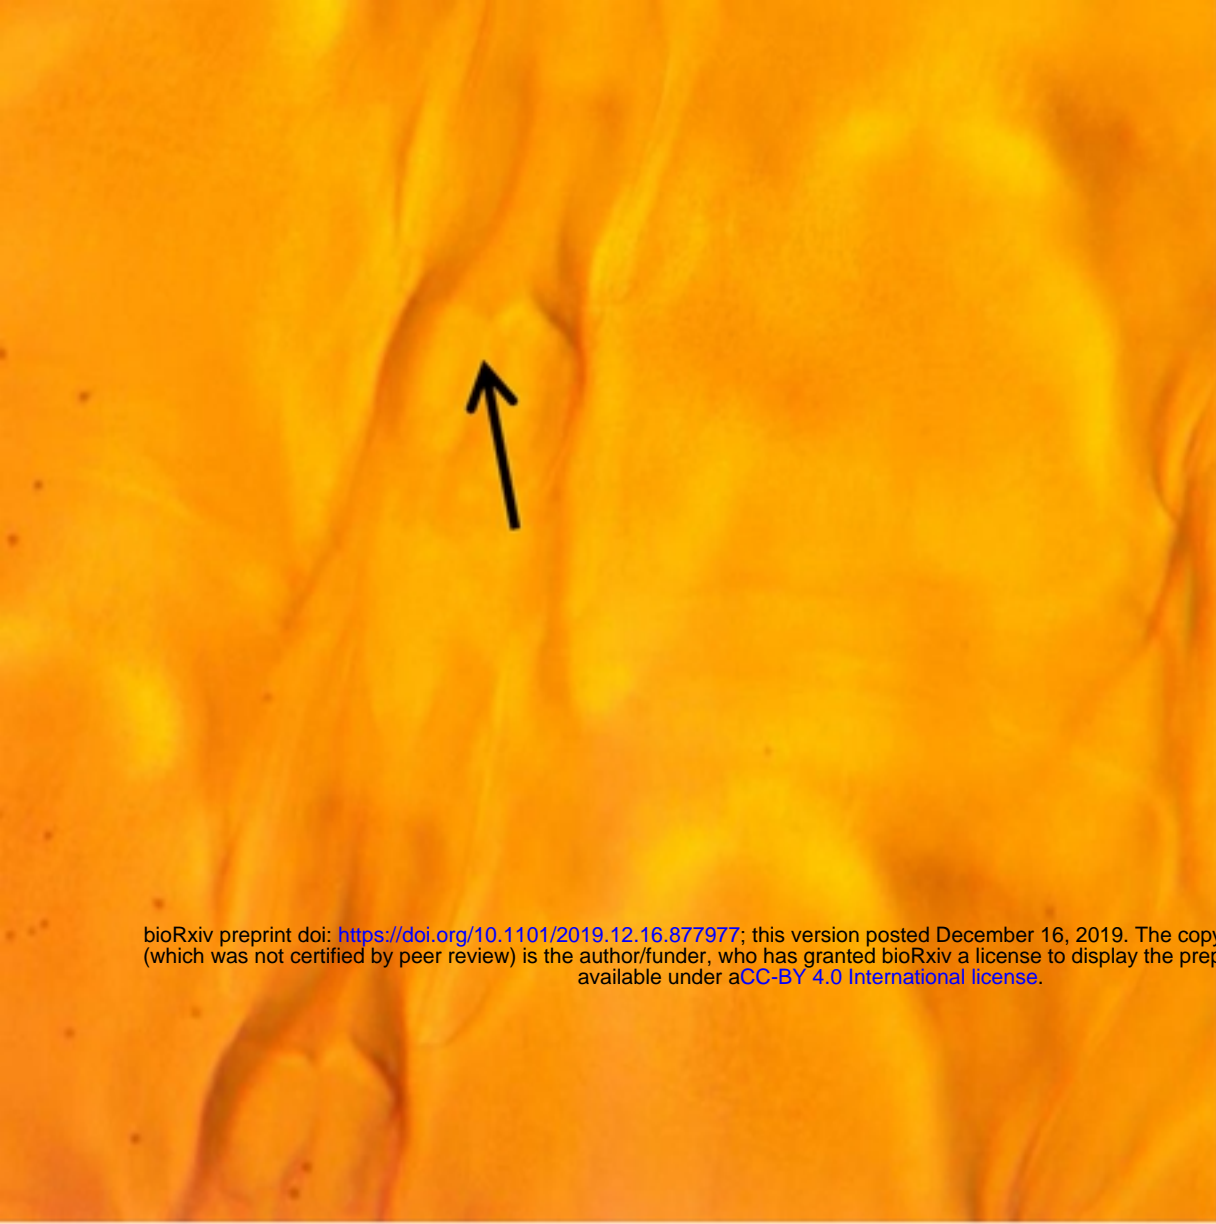

A

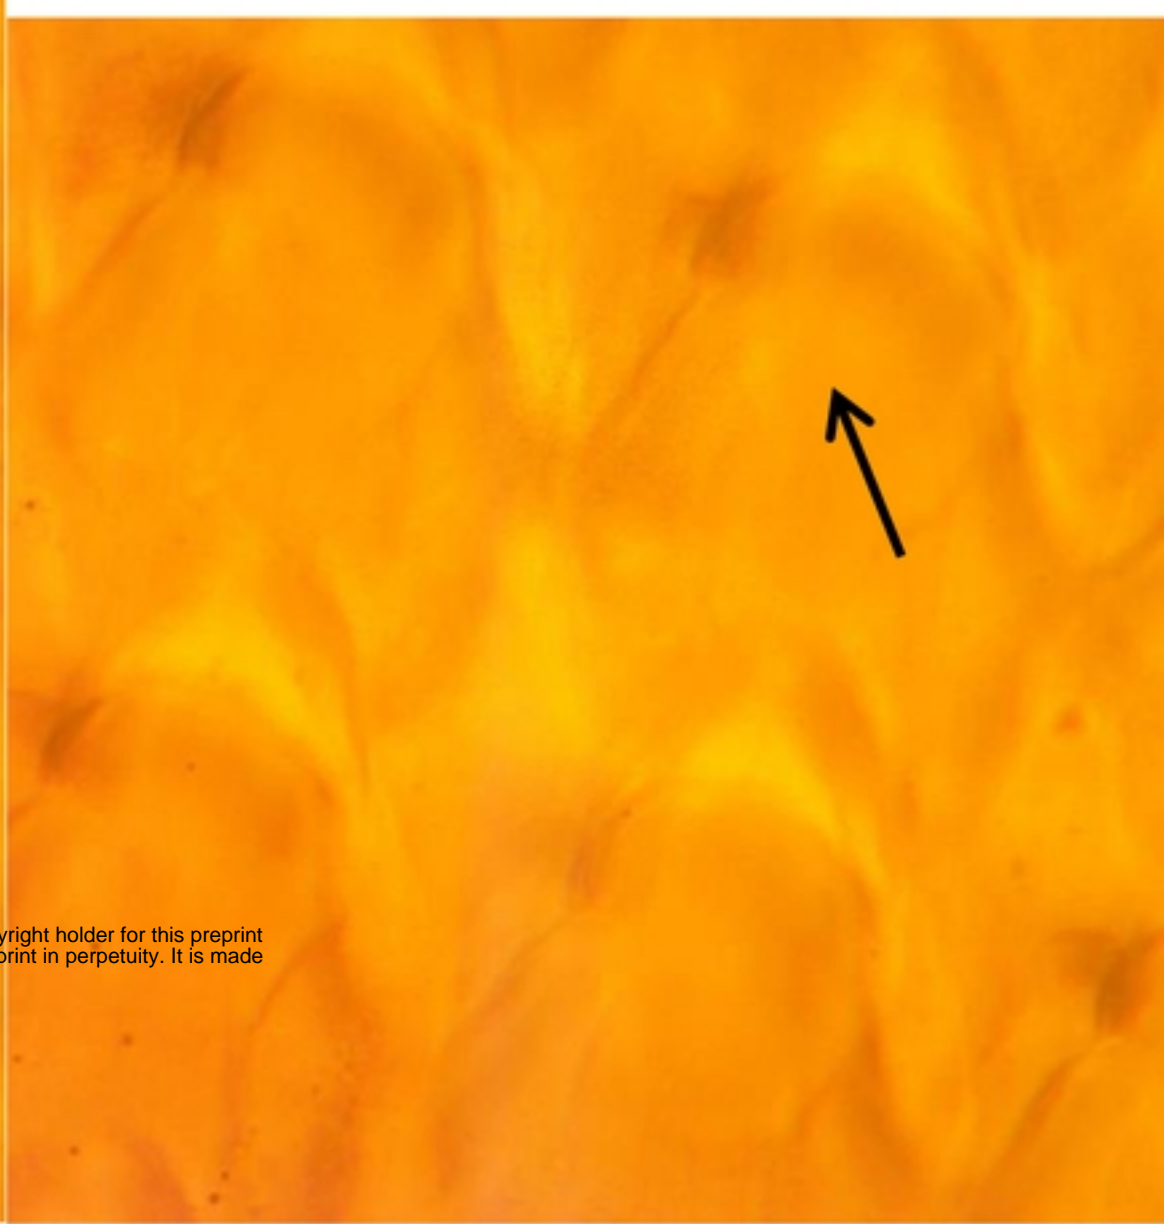

B

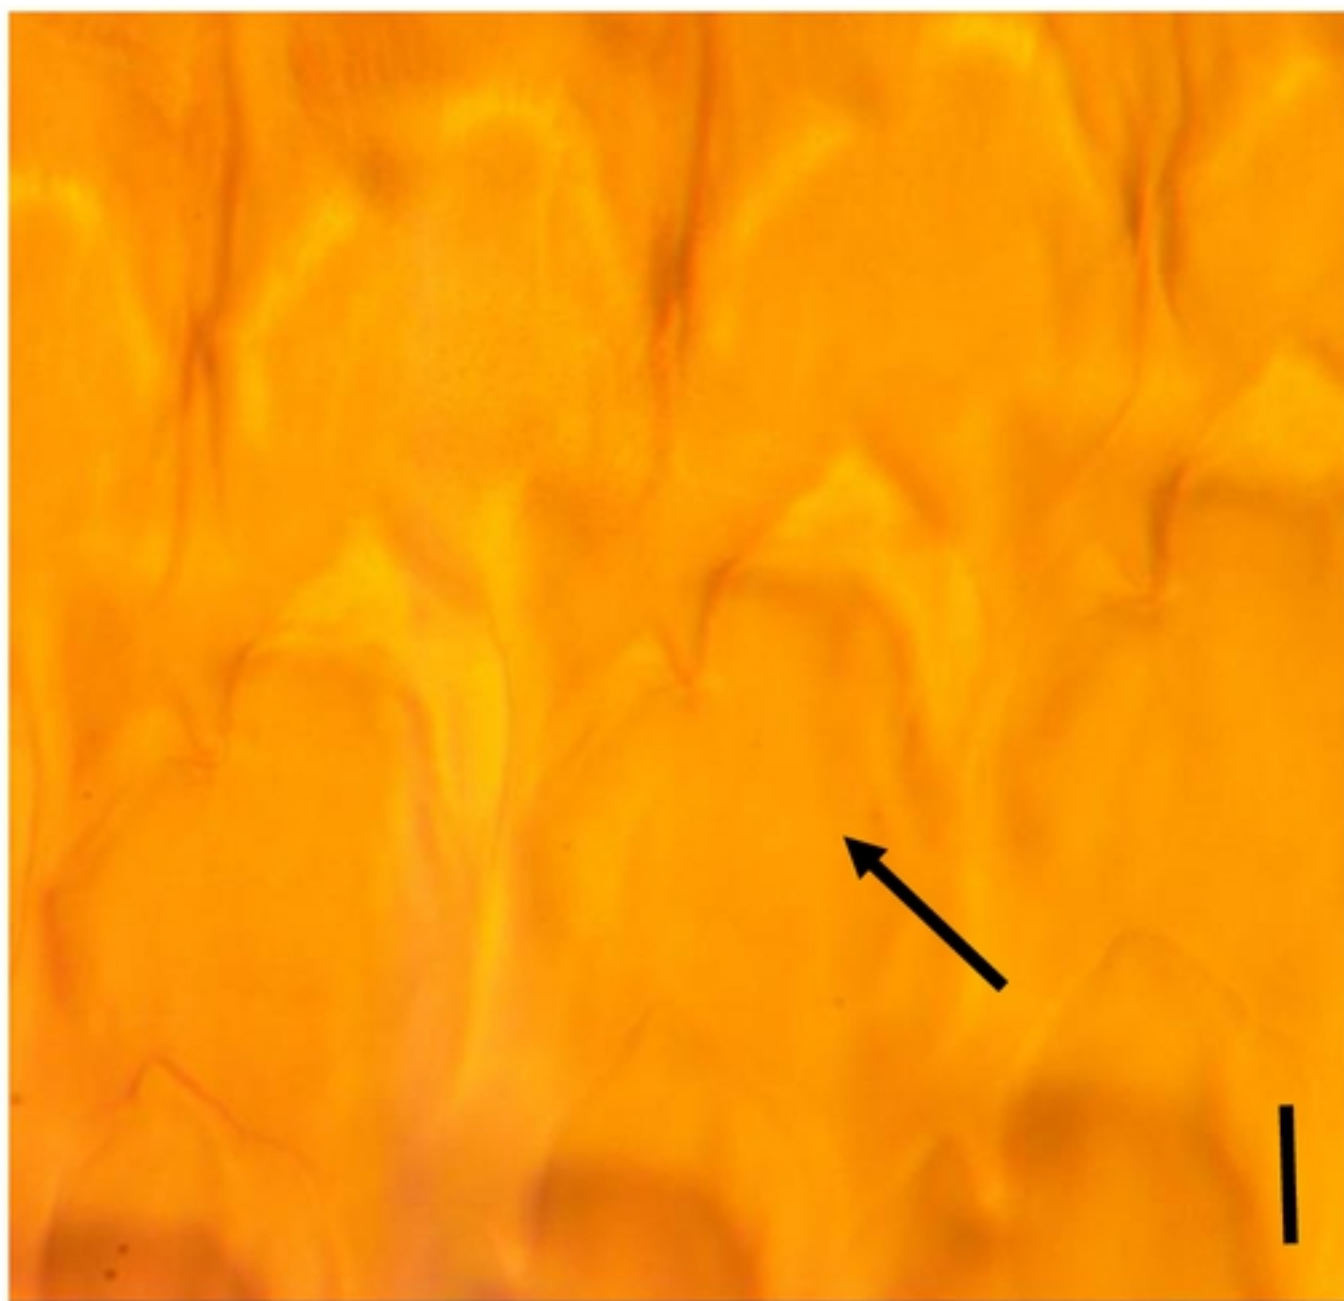

C

Figure

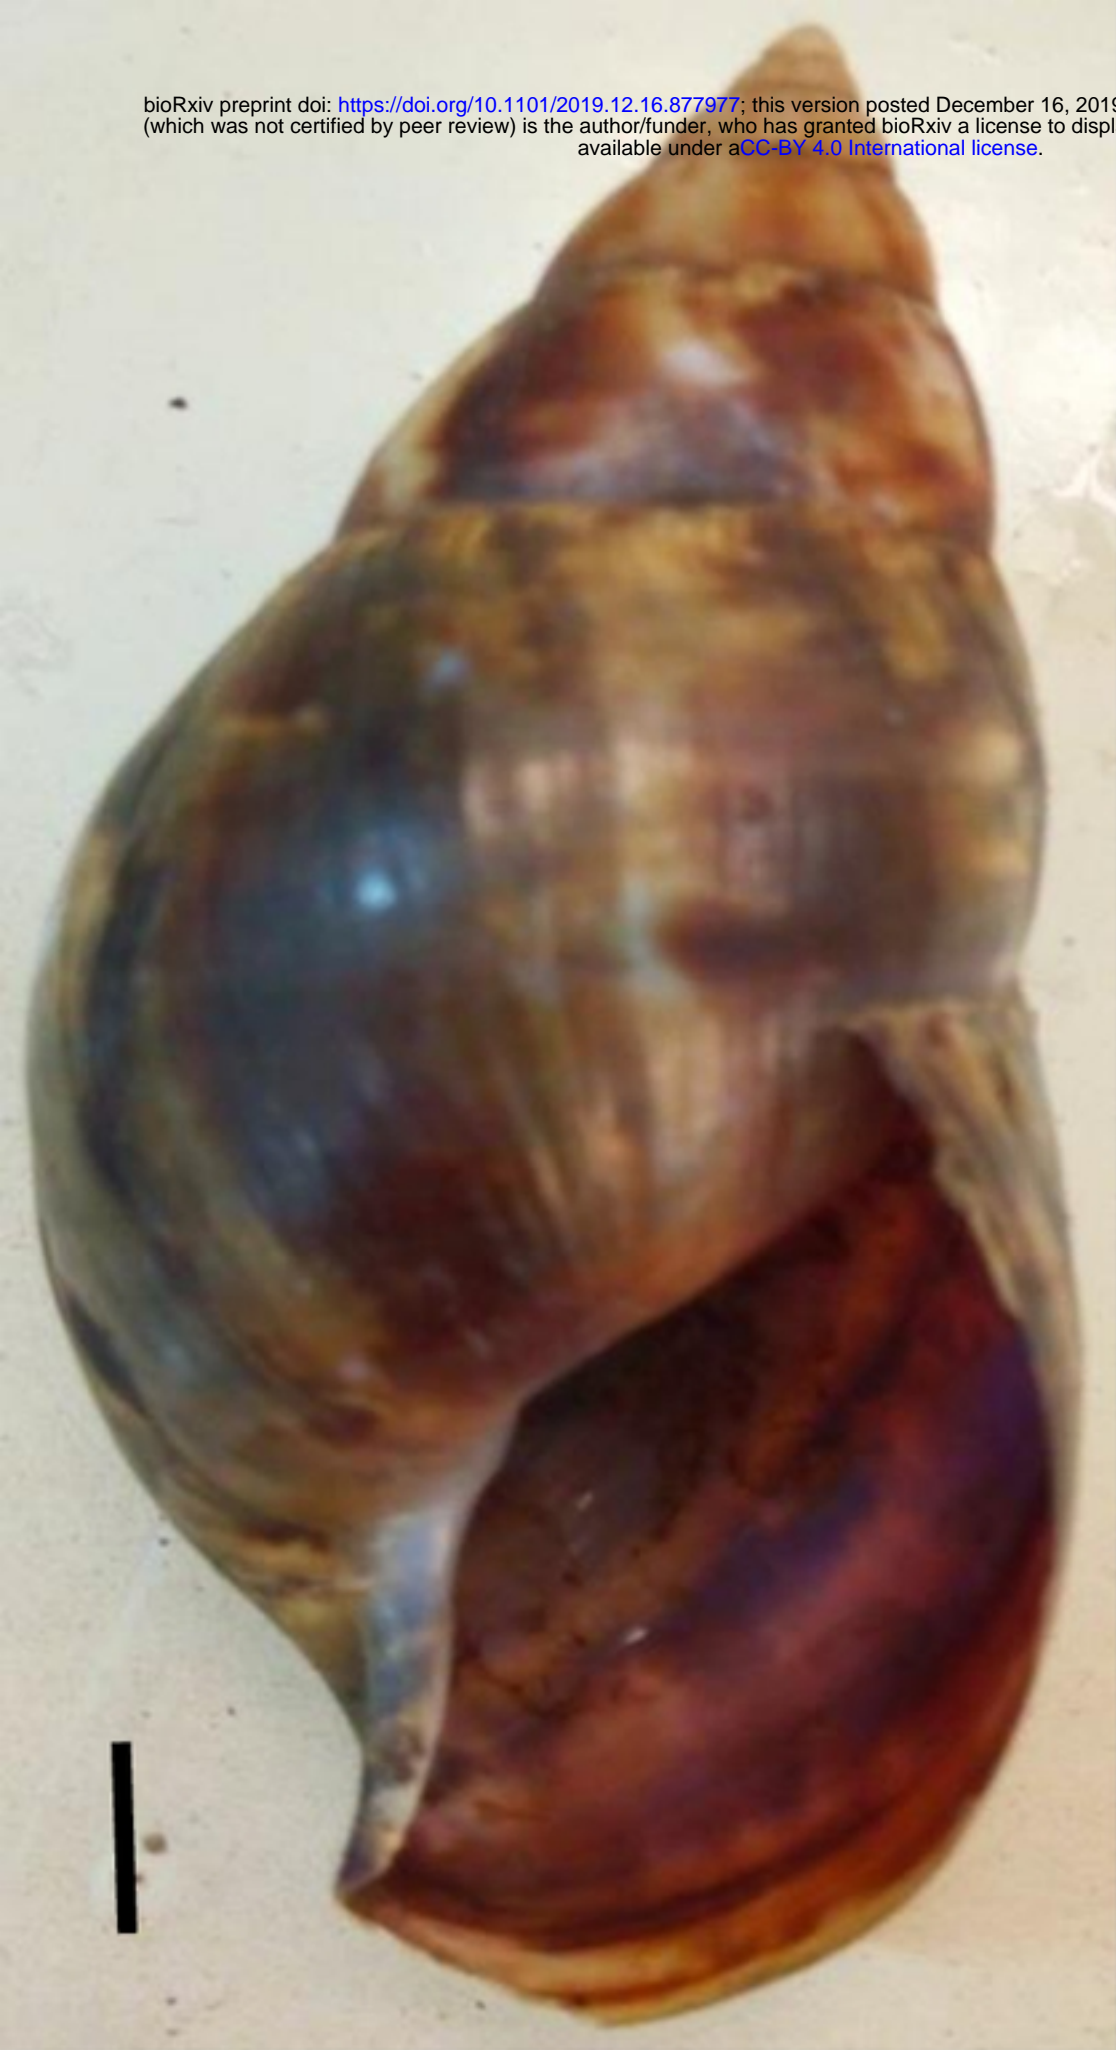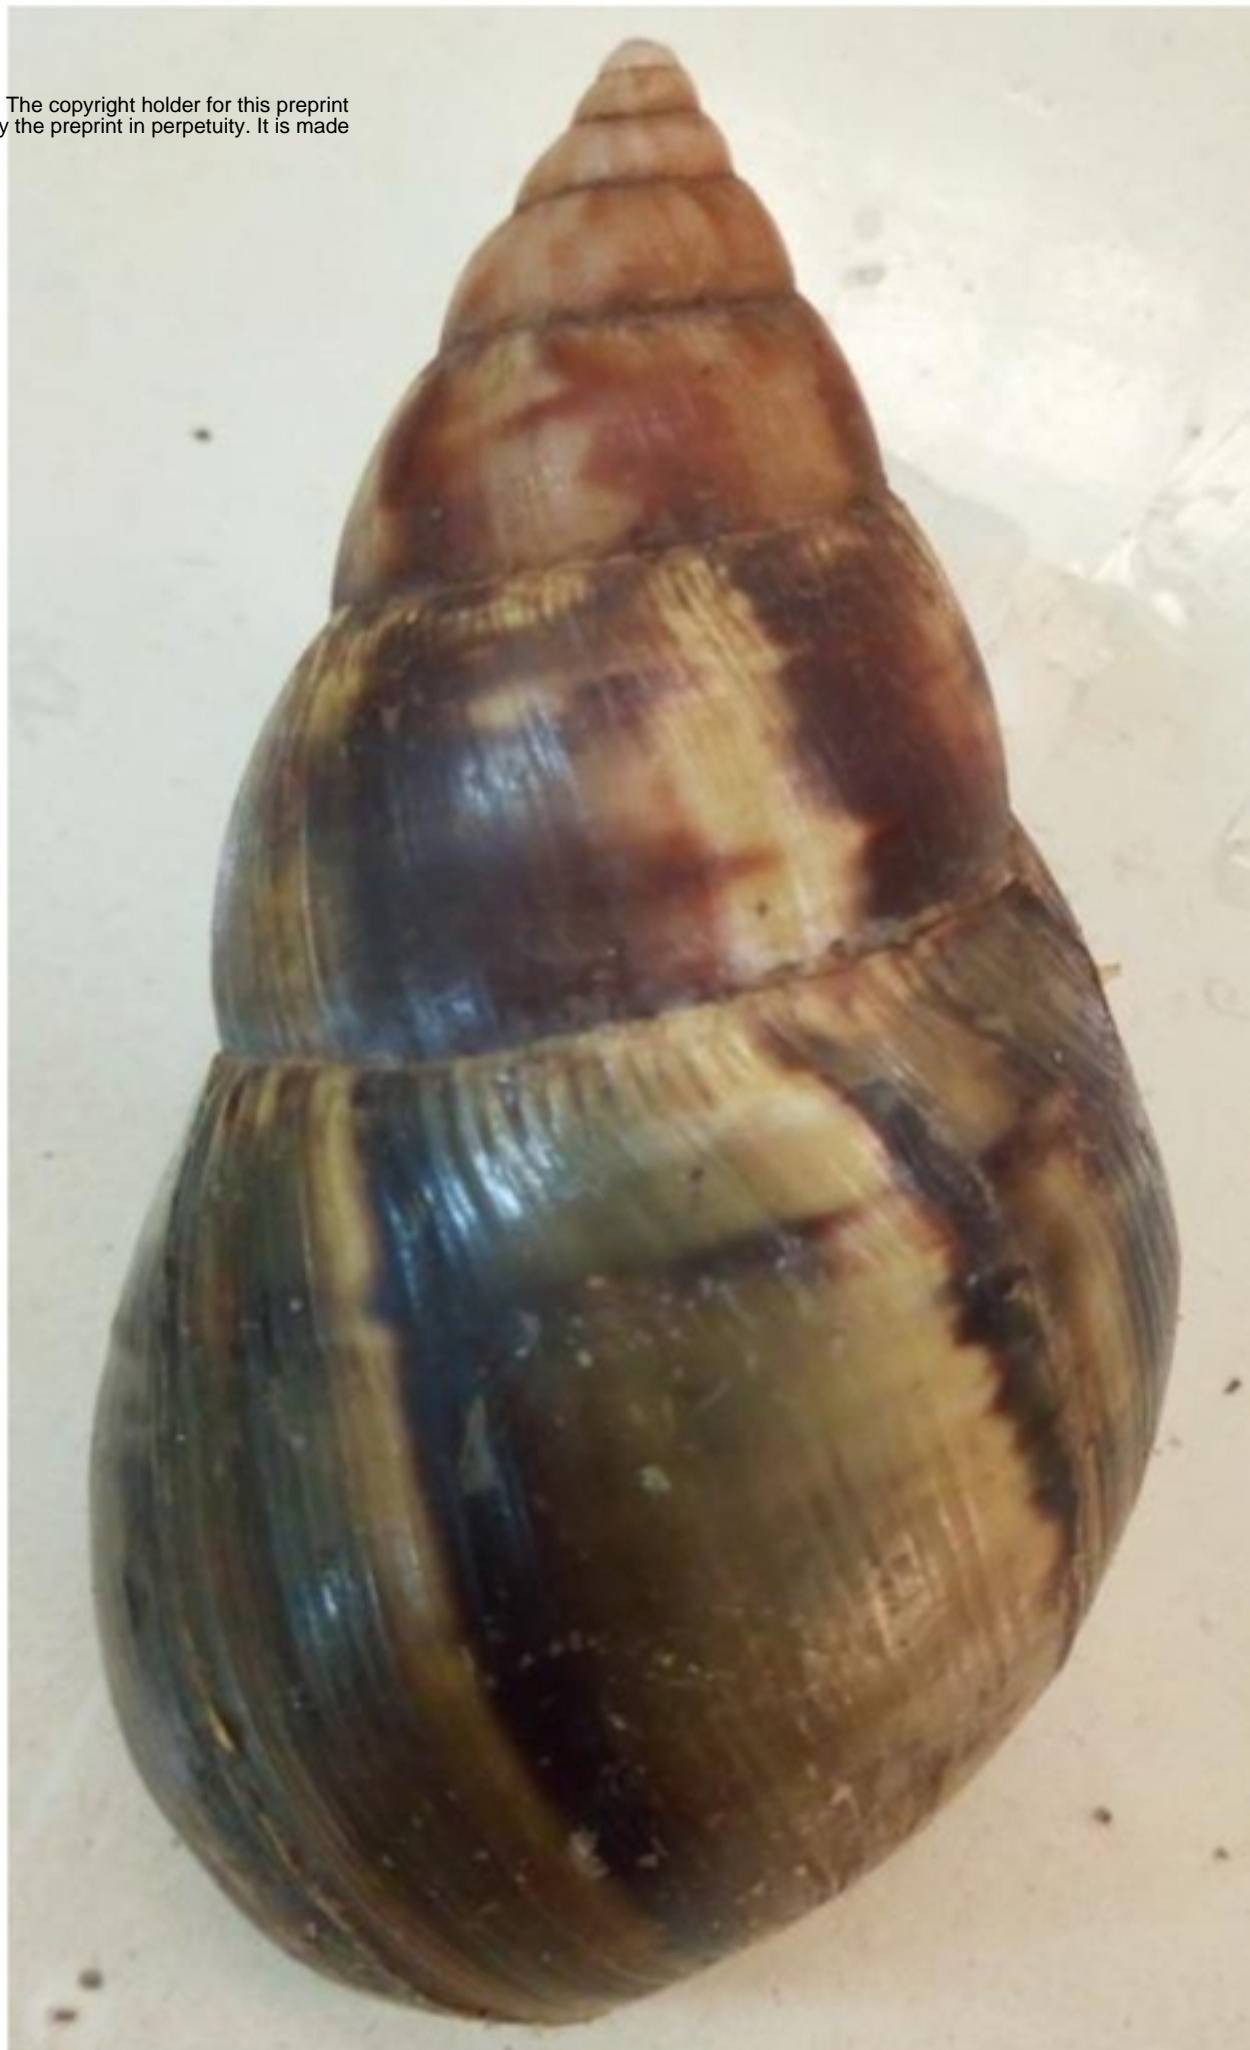

Figure

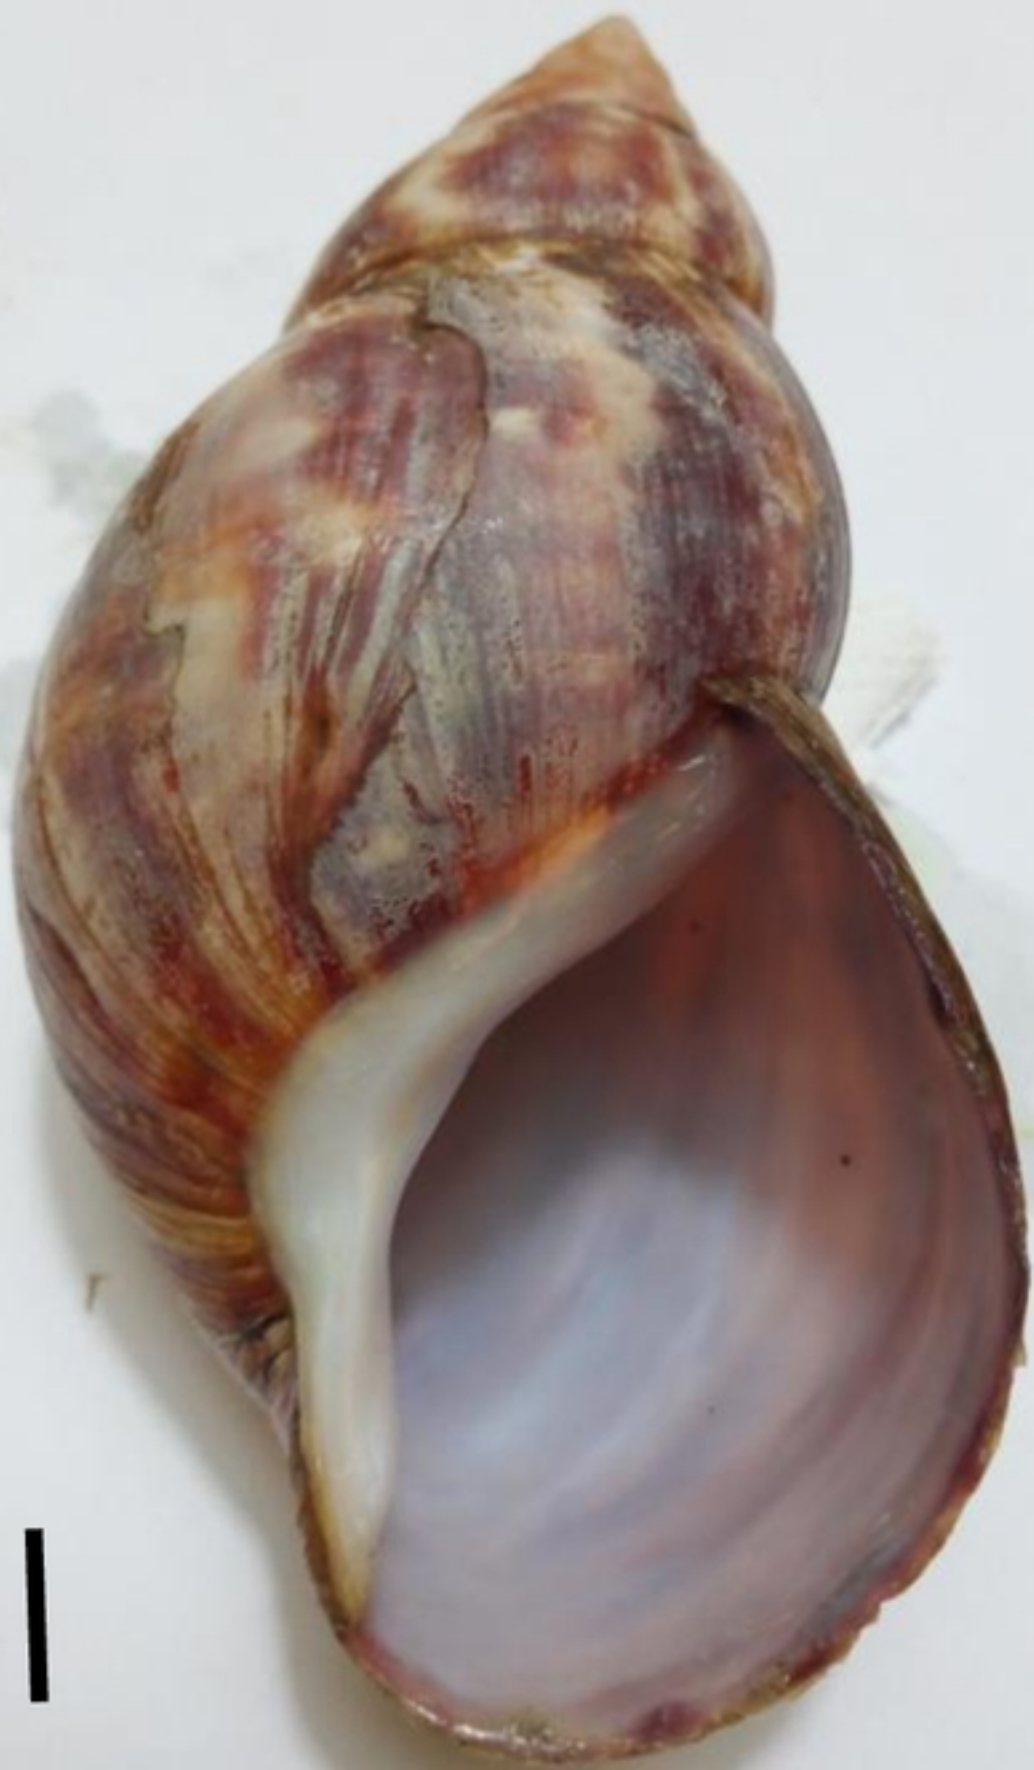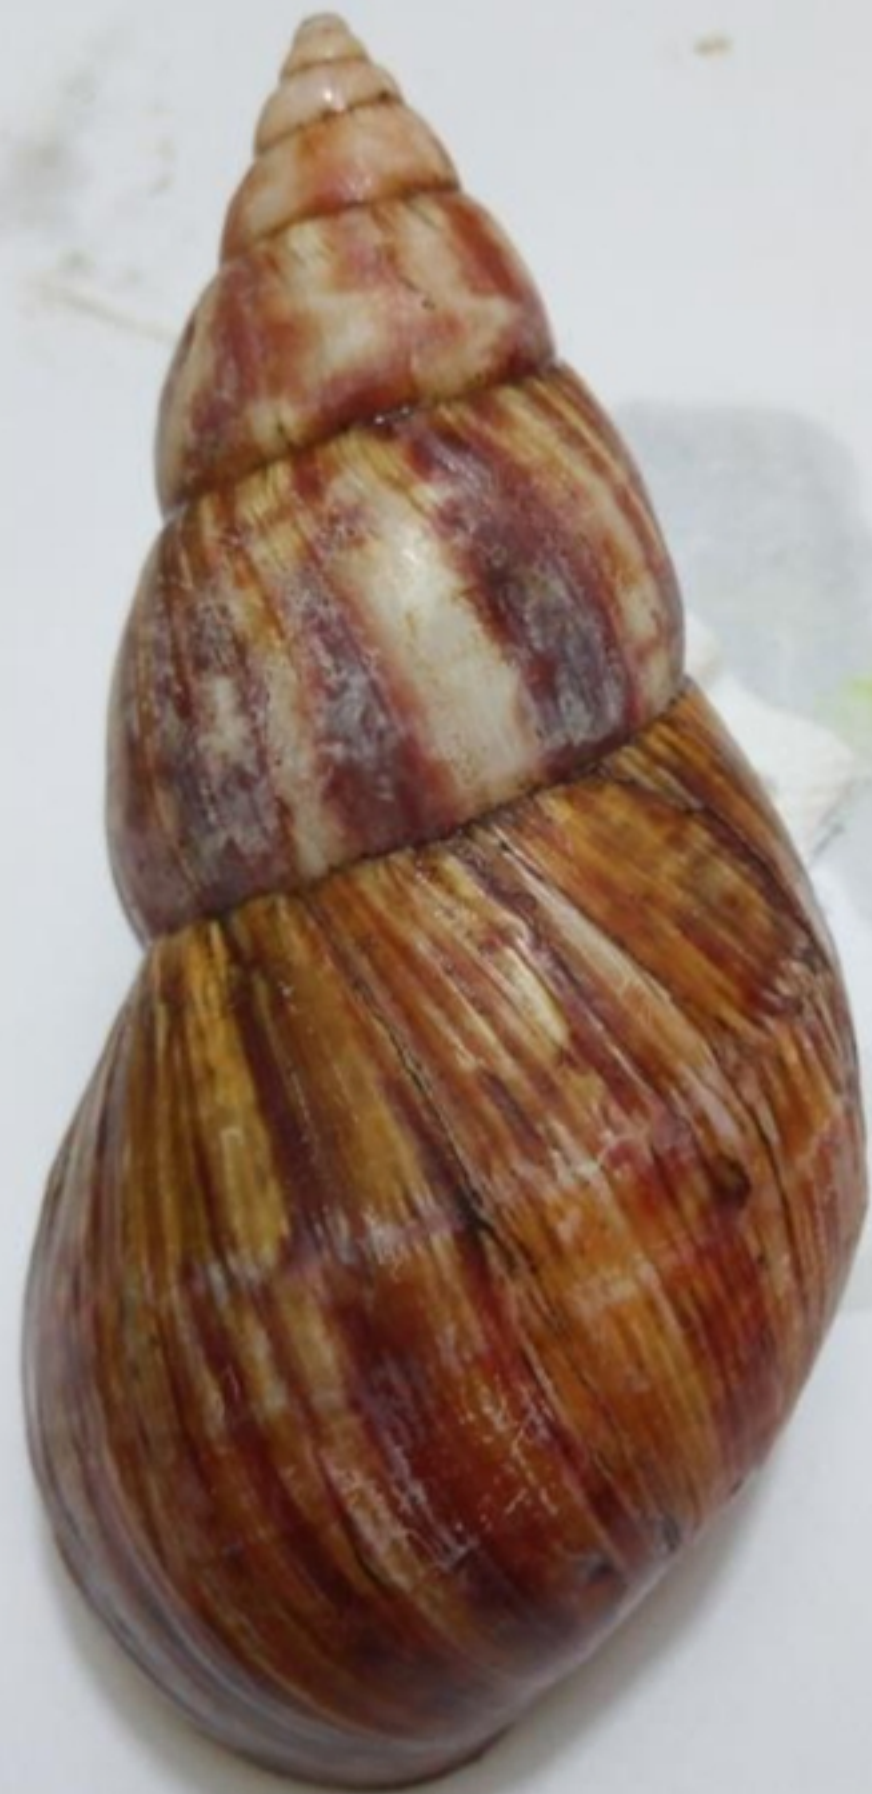

Figure



bioRxiv preprint doi: <https://doi.org/10.1101/2019.12.16.877977>; this version posted December 16, 2019. The copyright holder for this preprint (which was not certified by peer review) is the author/funder, who has granted bioRxiv a license to display the preprint in perpetuity. It is made available under aCC-BY 4.0 International license.

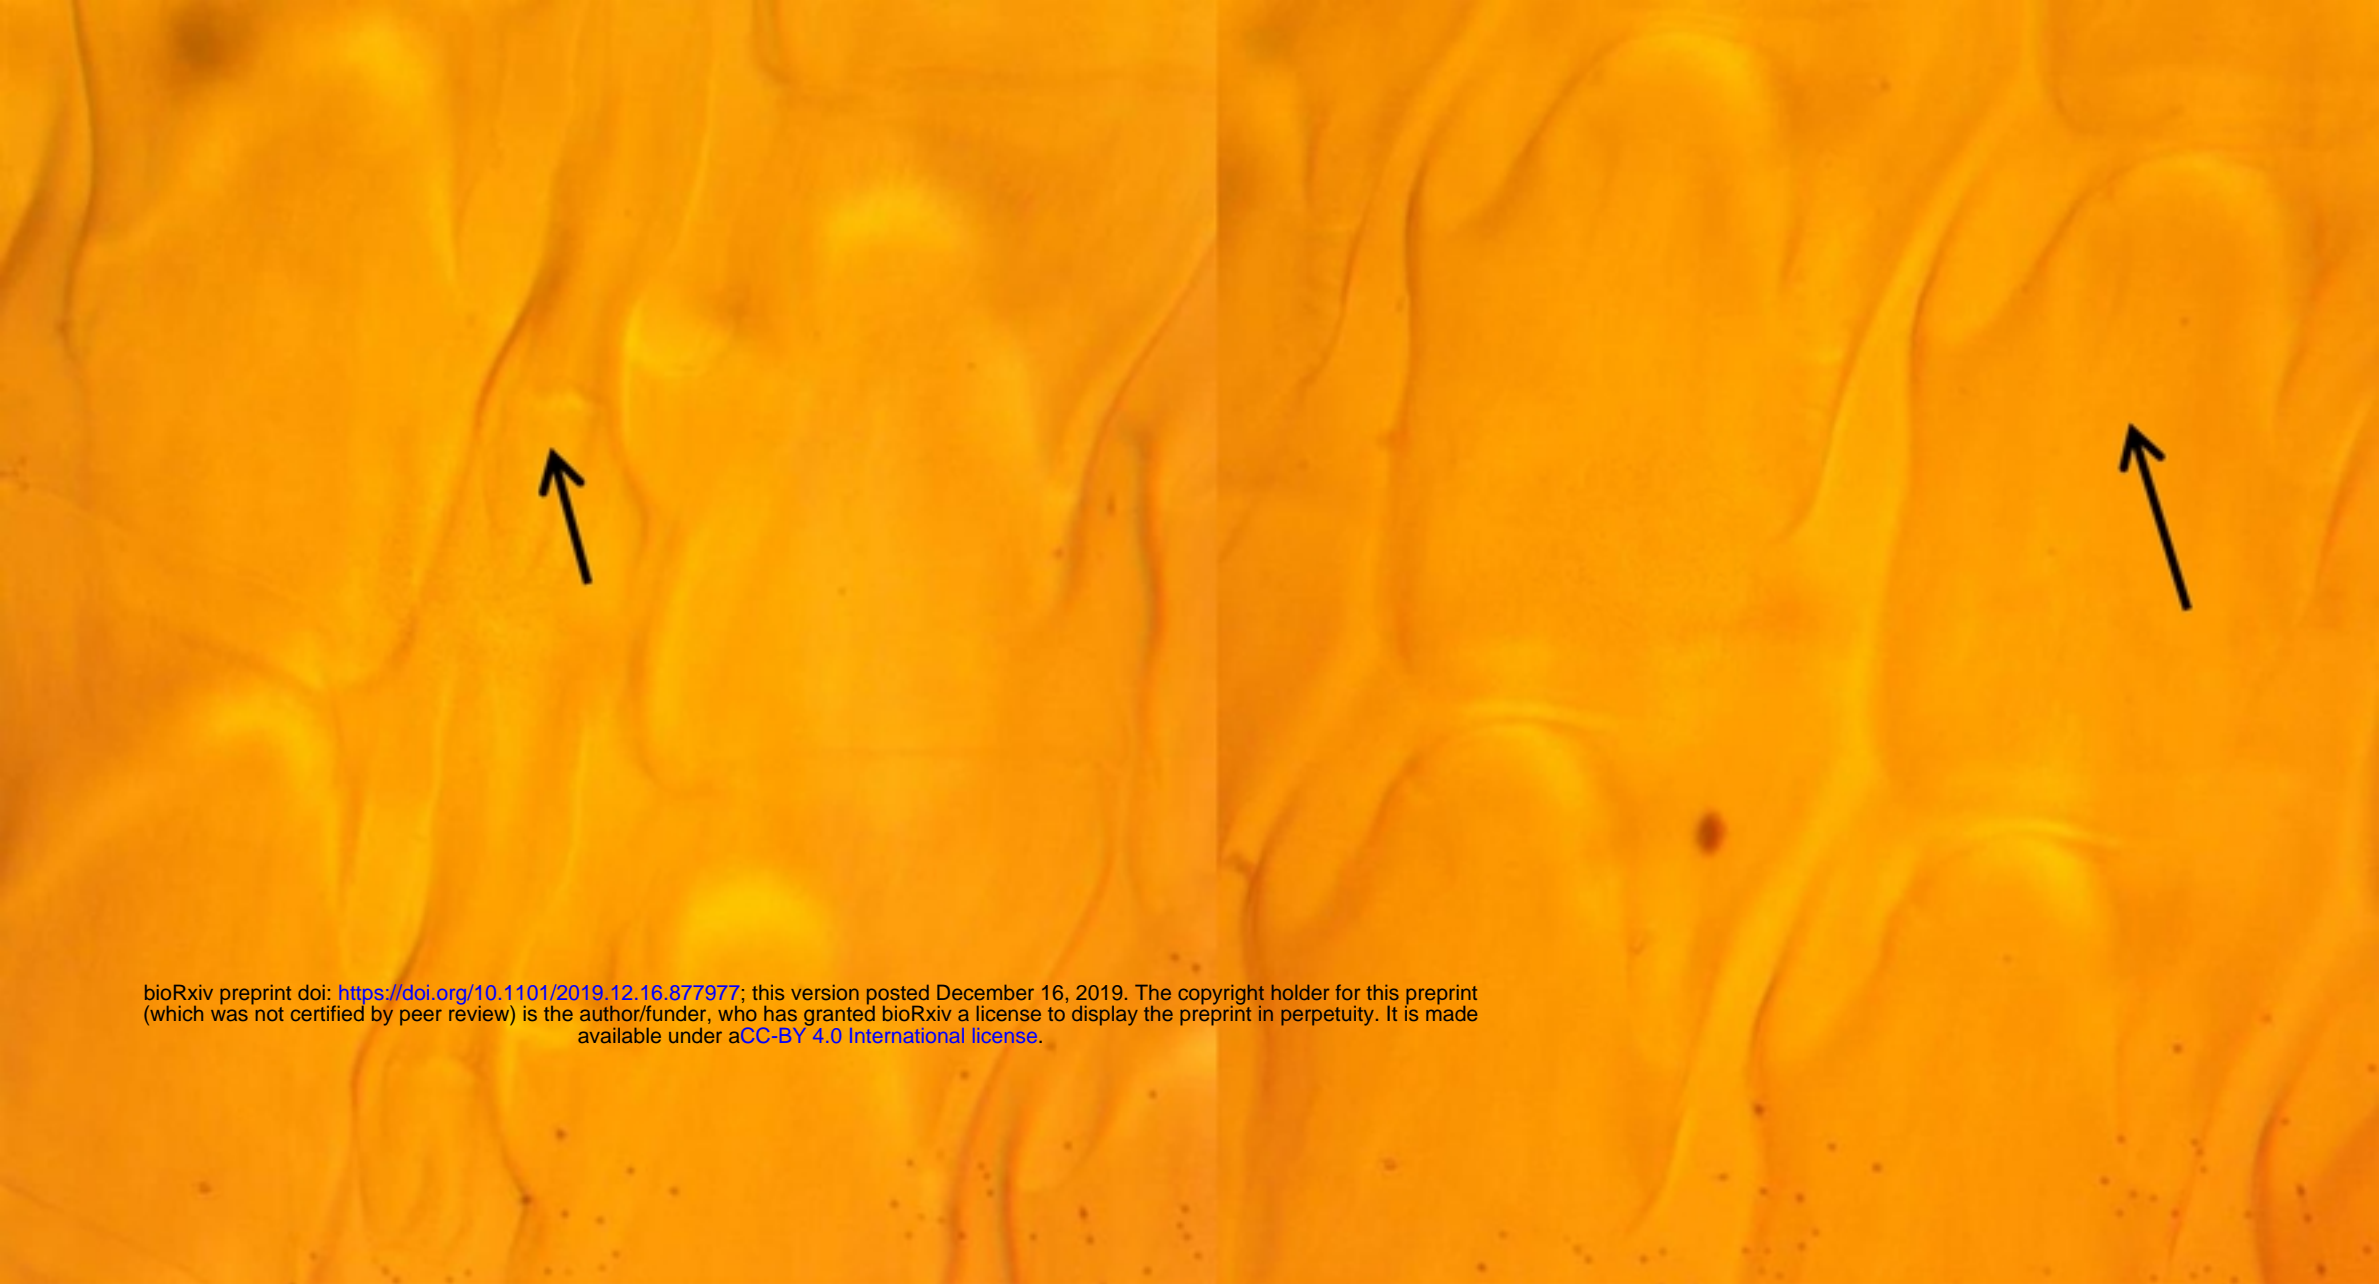

A

B

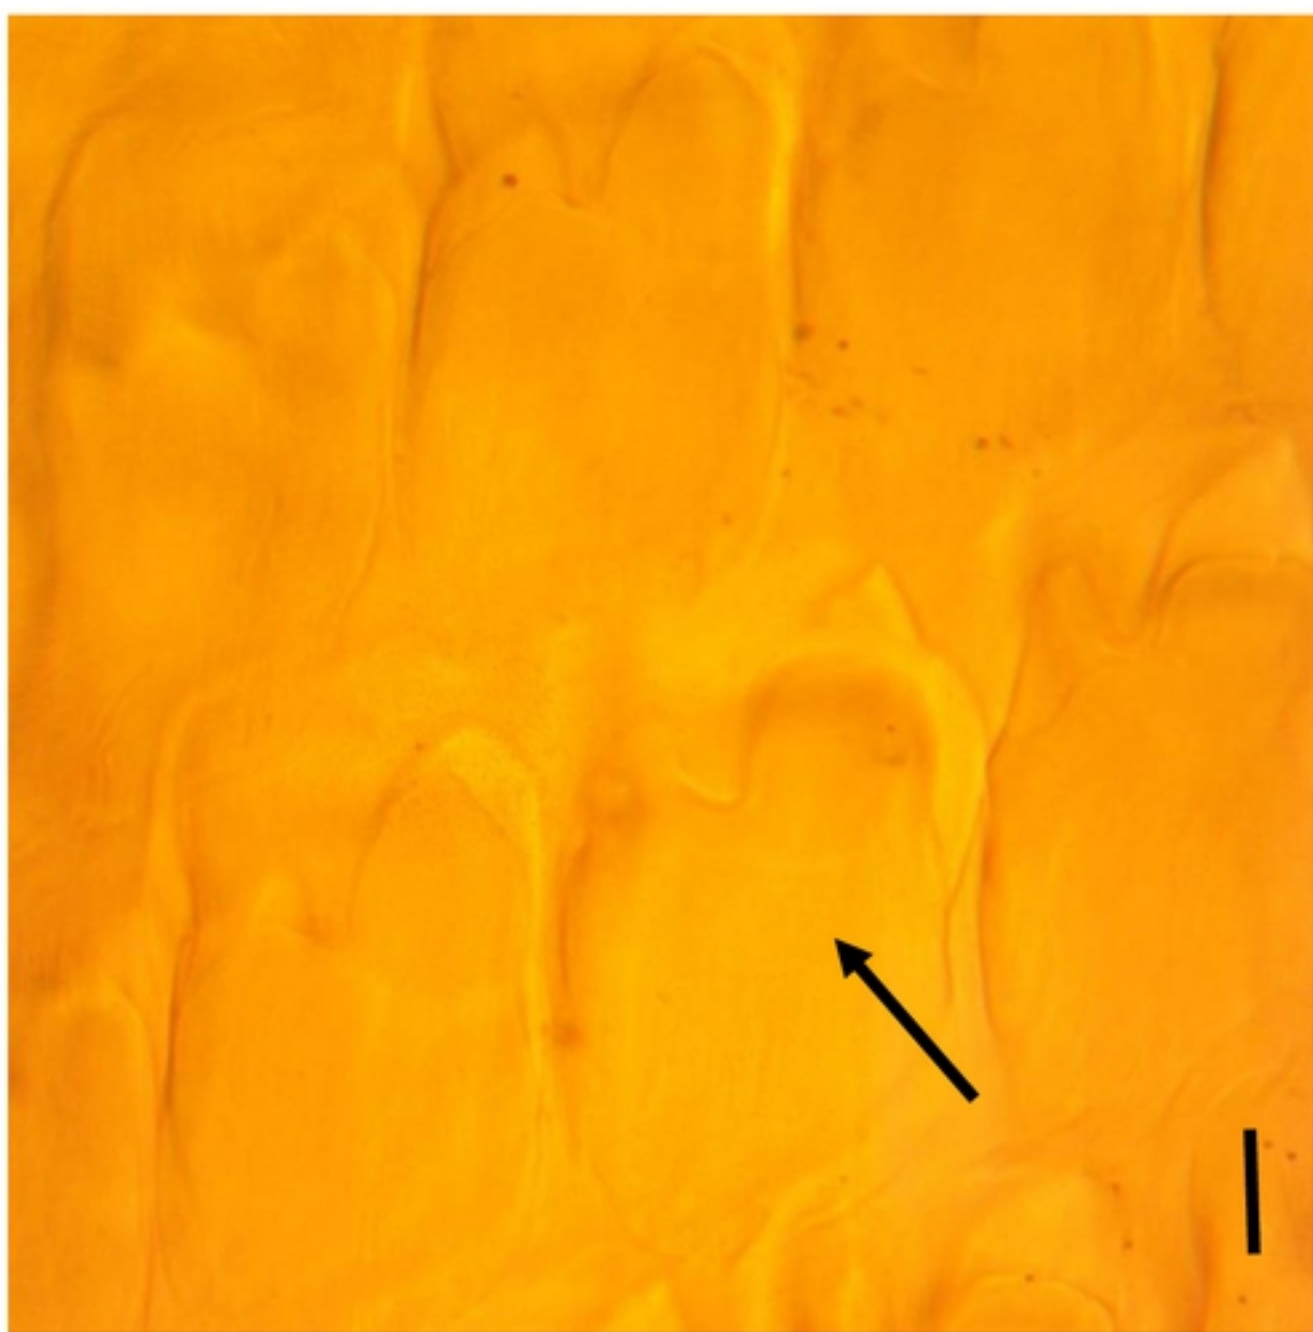

C

Figure

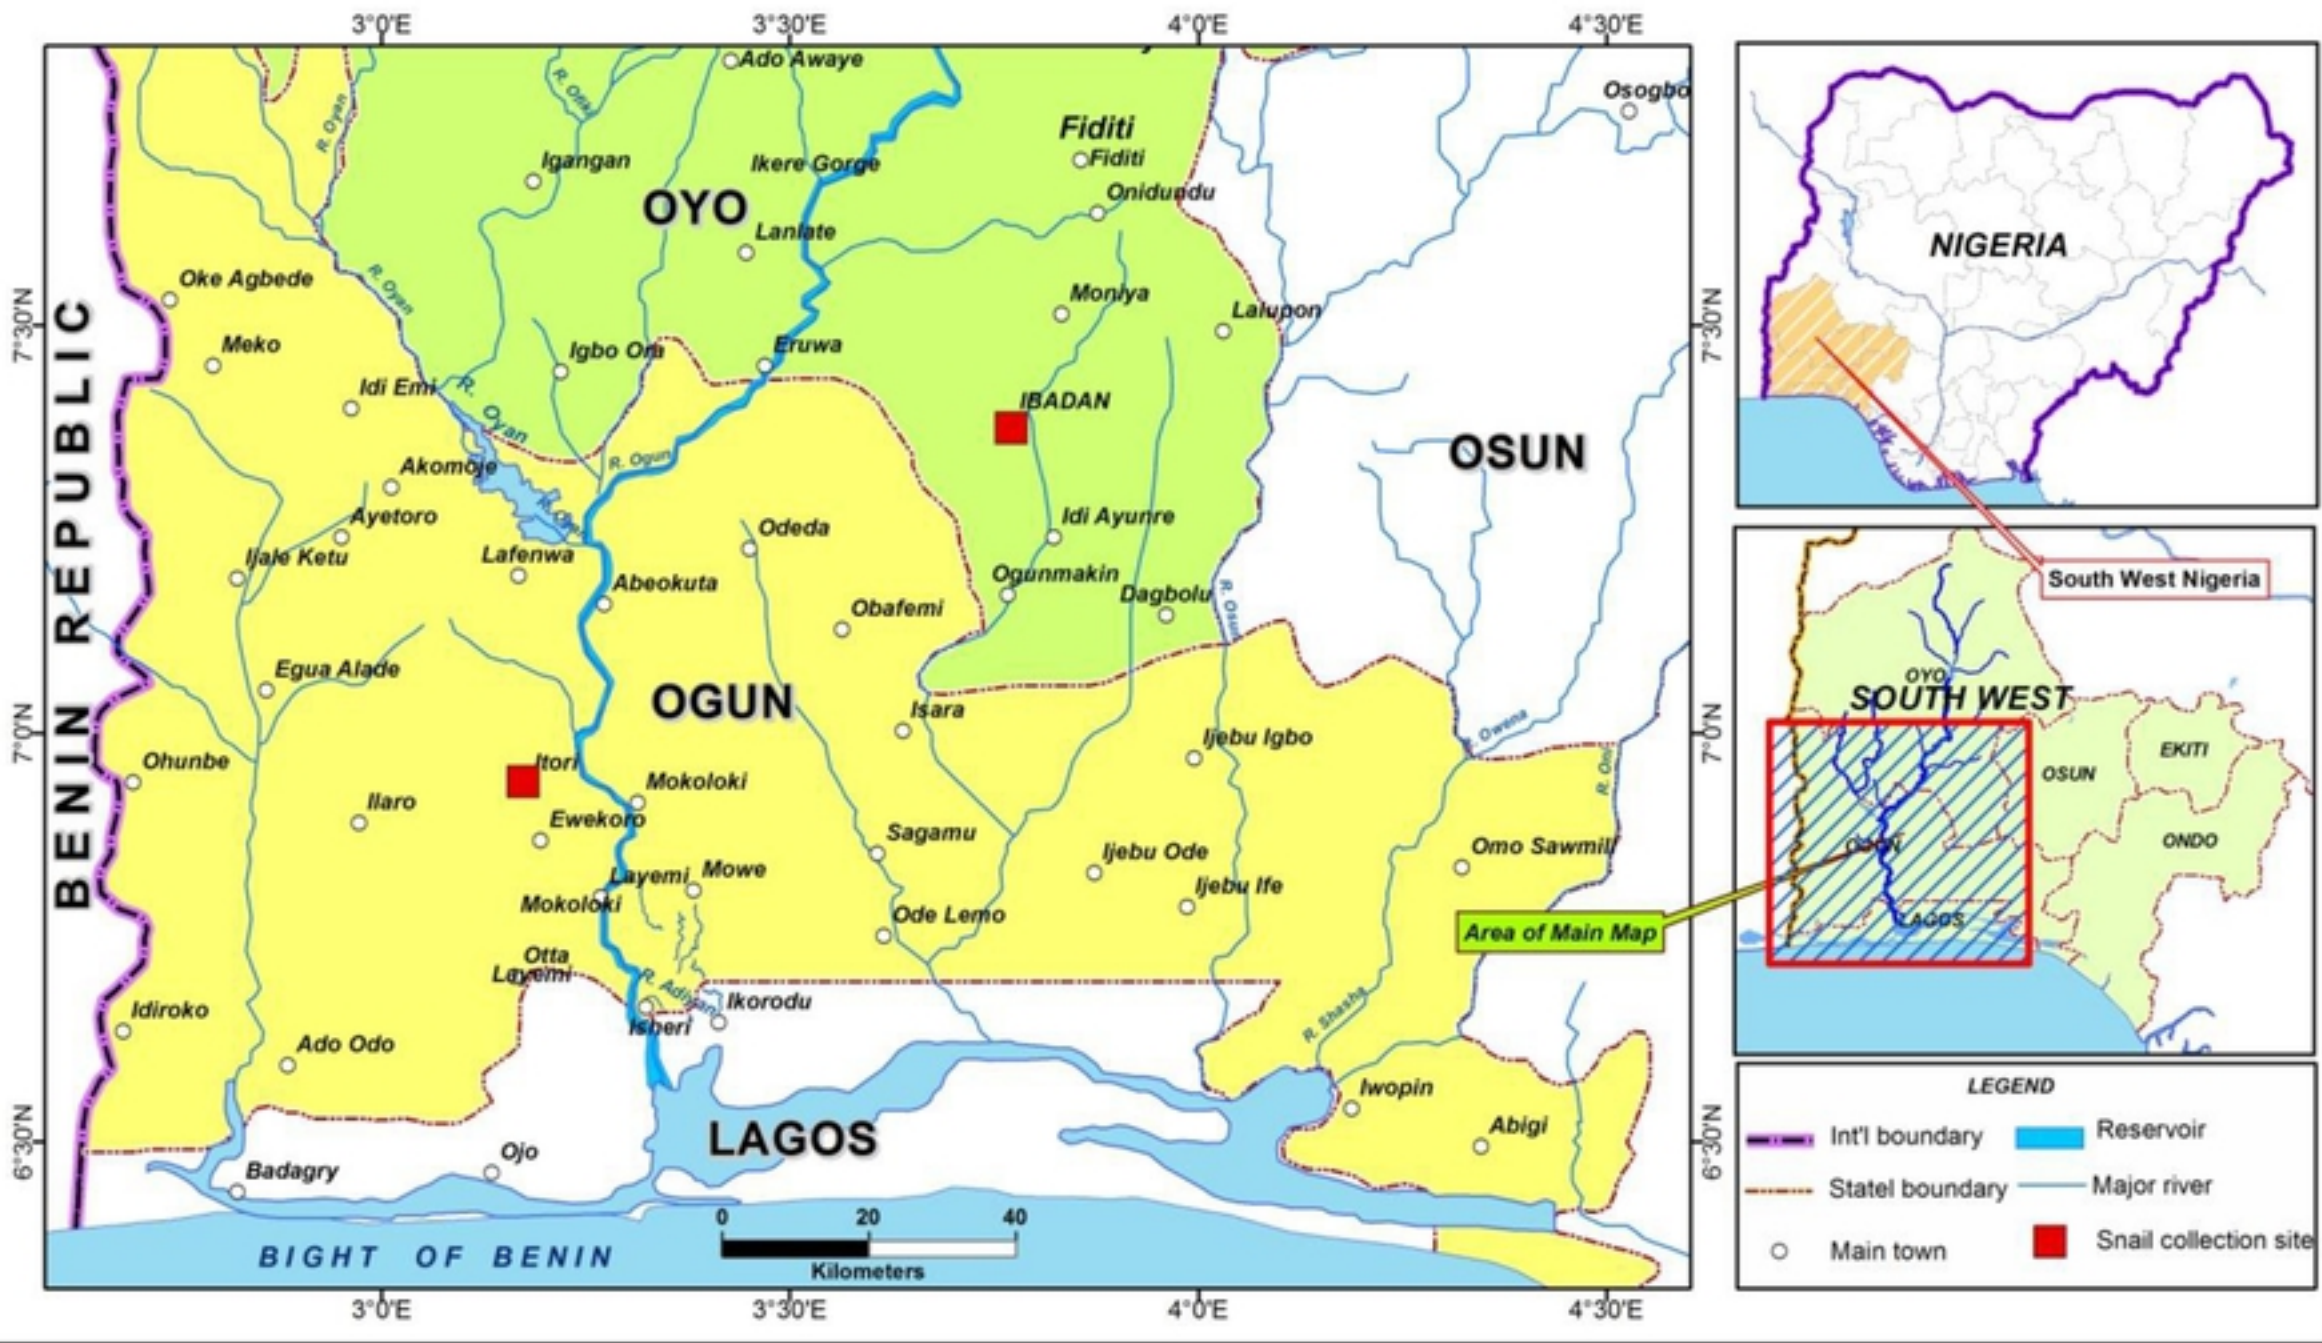

Figure

bioRxiv preprint doi: <https://doi.org/10.1101/2019.12.16.877977>; this version posted December 16, 2019. The copyright holder for this preprint (which was not certified by peer review) is the author/funder, who has granted bioRxiv a license to display the preprint in perpetuity. It is made available under aCC-BY 4.0 International license.

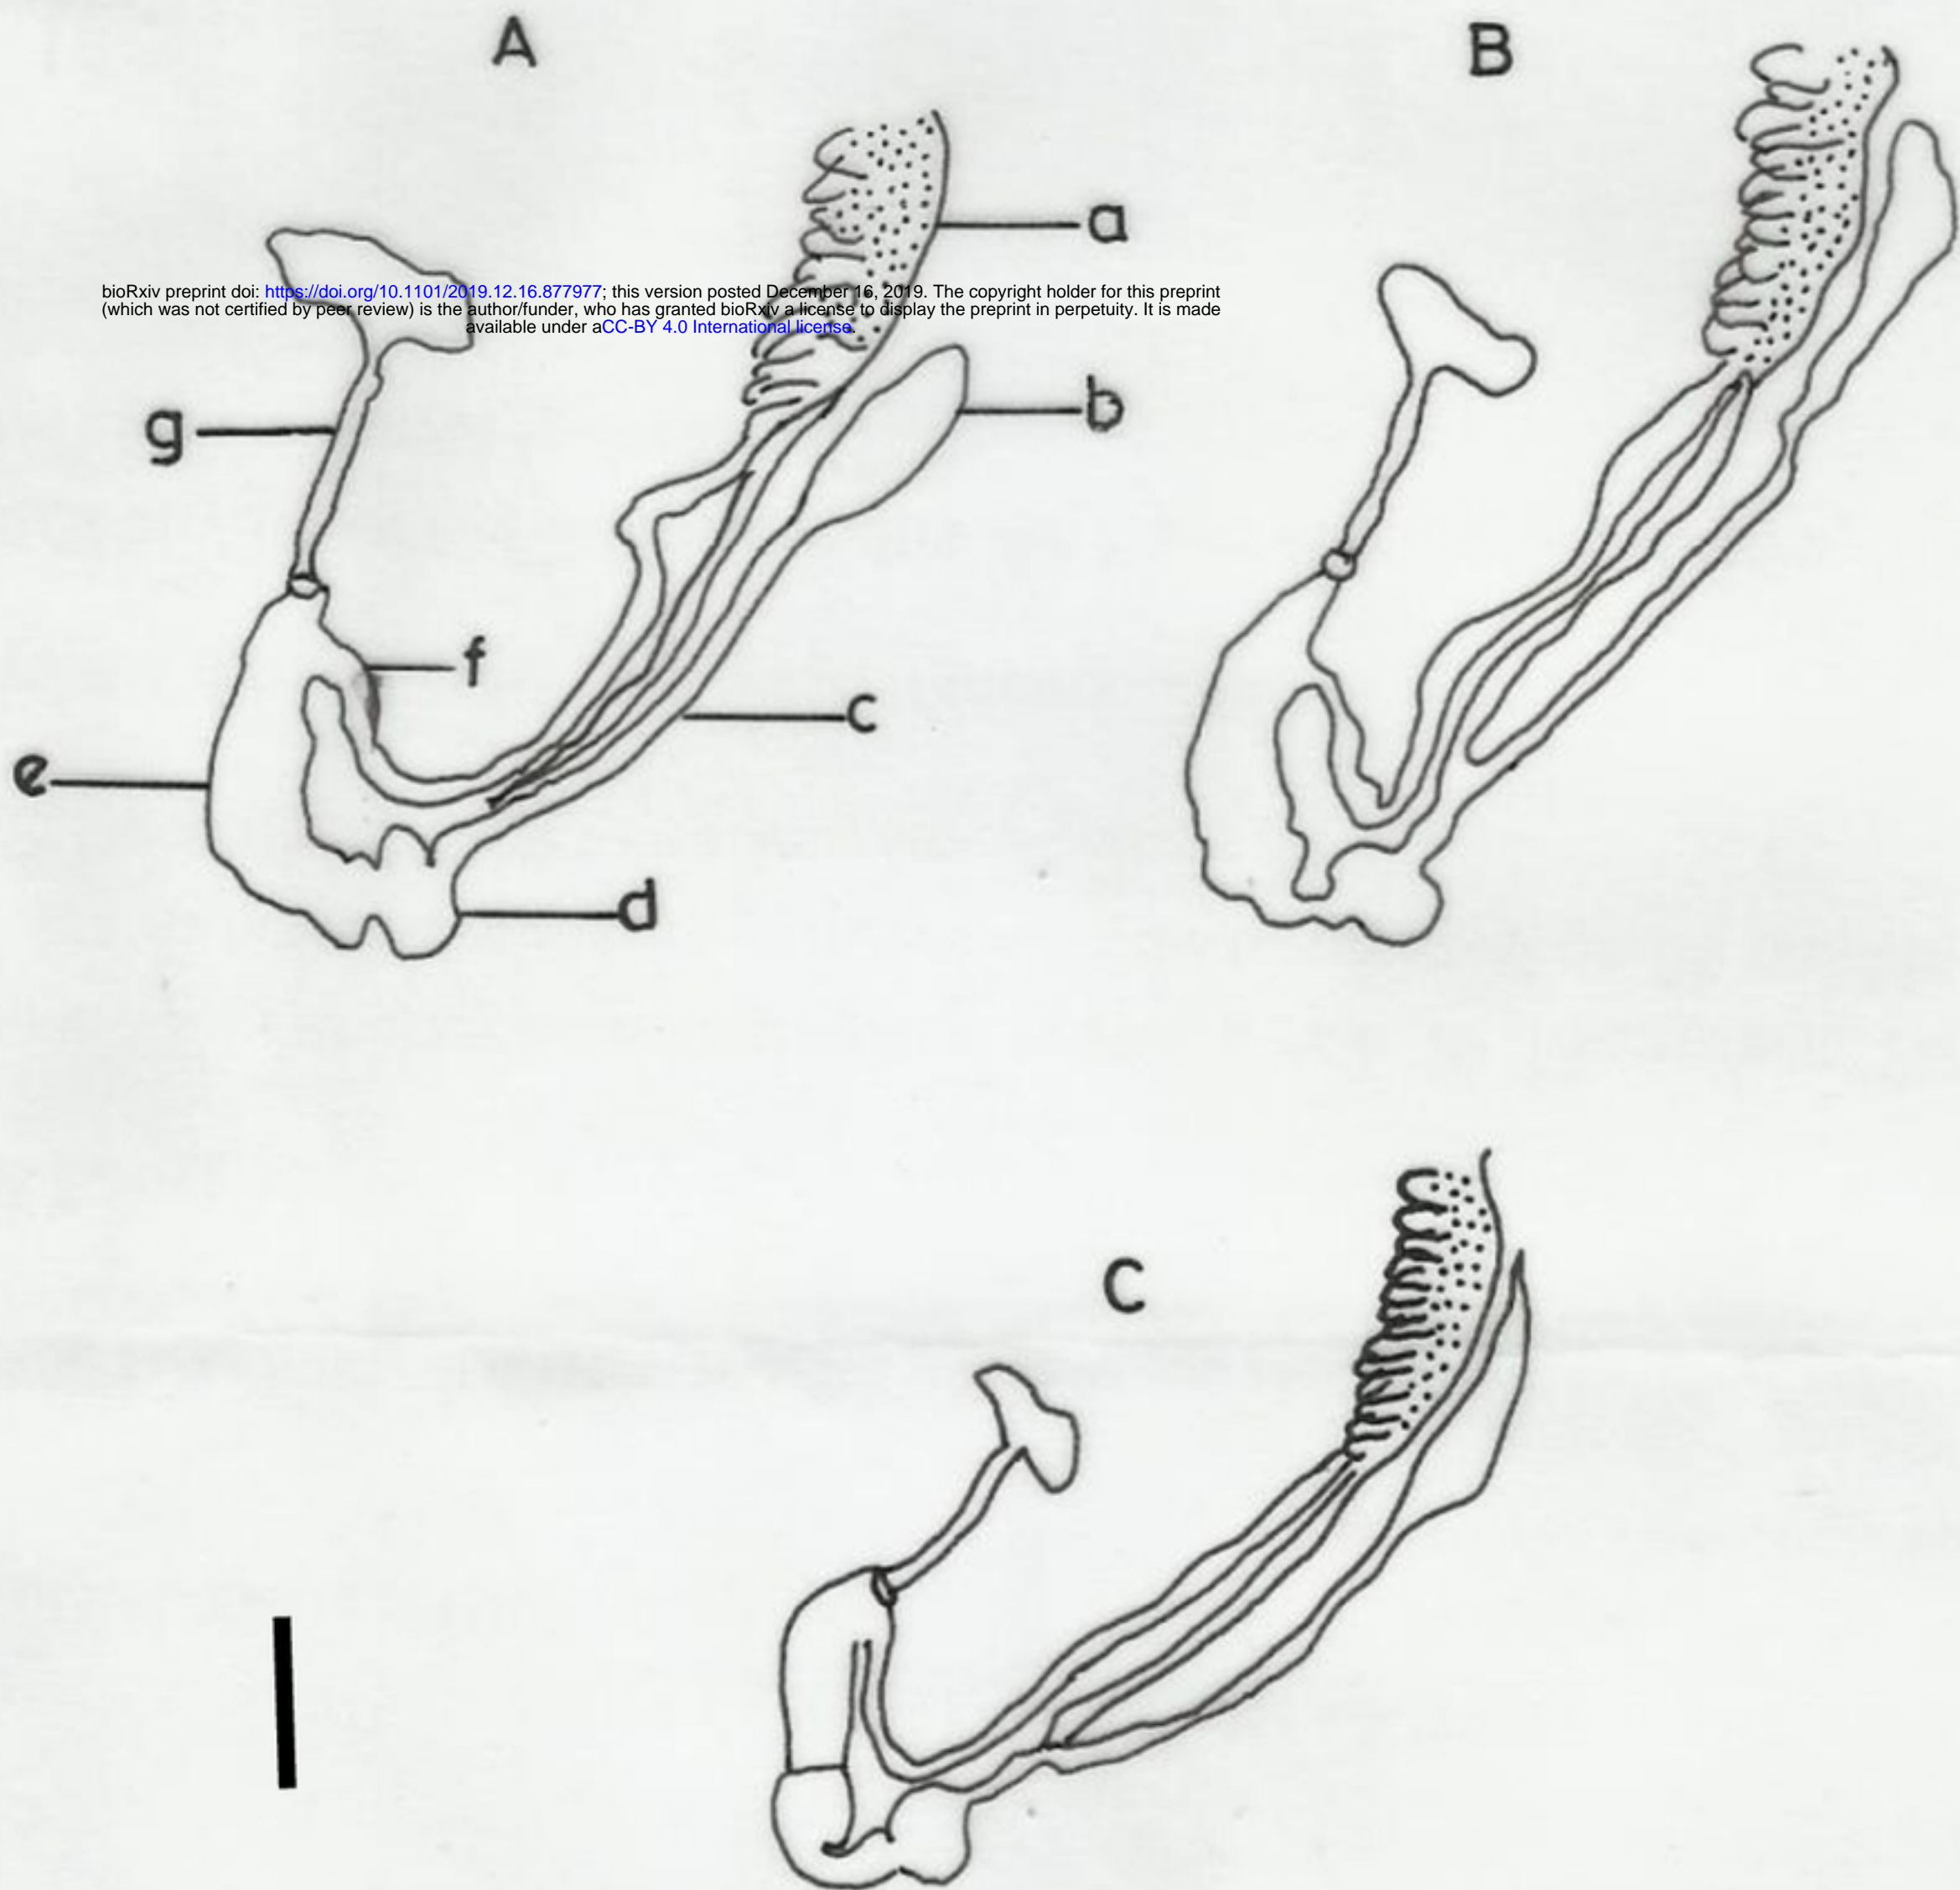

Figure
